# Supplementary material for: Nusinersen treatment in adult patients with spinal muscular atrophy: a safety analysis of laboratory parameters
Source: Springer Nature journal article supplement (doi:10.1007/s00415-021-10569-8), 2021-04-25
Supplement: MOESM1 [file 19103440]

## Supplemental Materials

### Nusinersen Treatment in Adult Patients with Spinal Muscular Atrophy - A Safety Analysis of Laboratory Parameters

#### Journal of Neurology

Benjamin Stolte<sup>1,5</sup>, Michael Nonnemacher<sup>2</sup>, Kathrin Kizina<sup>1,5</sup>, Saskia Bolz<sup>1,5</sup>, Andreas Totzeck<sup>1,5</sup>, Andreas Thimm<sup>1,5</sup>, Bernd Wagner<sup>3</sup>, Cornelius Deuschl<sup>4,5</sup>, Christoph Kleinschnitz<sup>1,5</sup>, Tim Hagenacker<sup>1,5</sup>

<sup>1</sup>Department of Neurology, University Hospital Essen, Essen, Germany

<sup>2</sup>Institute for Medical Informatics, Biometrics and Epidemiology, University Hospital Essen, Essen, Germany

<sup>3</sup>Department of Clinical Chemistry, University Hospital Essen, Essen, Germany

<sup>4</sup>Institute for Diagnostic and Interventional Radiology and Neuroradiology, University Hospital Essen, Essen, Germany

<sup>5</sup>Center for Translational and Behavioral Neuroscience, University Hospital Essen, Essen, Germany

#### Corresponding author:

Tim Hagenacker, MD

Department of Neurology

University Hospital Essen

Hufelandstr. 55

45147 Essen

Germany

e-mail: [tim.hagenacker@uk-essen.de](mailto:tim.hagenacker@uk-essen.de)

phone: +49 201 723 6513

Table S1a. Descriptive statistics: Cerebrospinal fluid (CSF) - White blood cell (WBC) count [number/ $\mu$ L].

| SMA type   | Injection | N  | Mean  | Std Dev | Median | Lower Quartile | Upper Quartile | Quartile Range | Minimum | Maximum |
|------------|-----------|----|-------|---------|--------|----------------|----------------|----------------|---------|---------|
| SMA type 2 | L1        | 13 | 2.308 | 4.250   | 1.000  | 1.000          | 2.000          | 1.000          | 0.000   | 16.000  |
|            | L2        | 9  | 3.000 | 4.848   | 1.000  | 0.000          | 4.000          | 4.000          | 0.000   | 15.000  |
|            | L3        | 13 | 3.846 | 4.913   | 1.000  | 0.000          | 5.000          | 5.000          | 0.000   | 13.000  |
|            | L4        | 11 | 1.909 | 3.145   | 1.000  | 0.000          | 2.000          | 2.000          | 0.000   | 11.000  |
|            | M1        | 11 | 2.455 | 5.556   | 1.000  | 0.000          | 1.000          | 1.000          | 0.000   | 19.000  |
|            | M2        | 9  | 1.222 | 0.972   | 1.000  | 1.000          | 2.000          | 1.000          | 0.000   | 3.000   |
|            | M3        | 12 | 2.083 | 3.728   | 1.000  | 0.000          | 2.000          | 2.000          | 0.000   | 13.000  |
|            | M4        | 8  | 0.875 | 1.356   | 0.500  | 0.000          | 1.000          | 1.000          | 0.000   | 4.000   |
|            | M5        | 7  | 1.429 | 1.272   | 1.000  | 1.000          | 2.000          | 1.000          | 0.000   | 4.000   |
|            | M6        | 3  | 1.667 | 1.528   | 2.000  | 0.000          | 3.000          | 3.000          | 0.000   | 3.000   |
|            | M7        | 1  | 1.000 | .       | 1.000  | 1.000          | 1.000          | 0.000          | 1.000   | 1.000   |
|            | M8        | 0  | .     | .       | .      | .              | .              | .              | .       | .       |
| SMA type 3 | L1        | 34 | 2.441 | 2.439   | 1.500  | 1.000          | 3.000          | 2.000          | 0.000   | 13.000  |
|            | L2        | 33 | 2.909 | 2.529   | 3.000  | 1.000          | 4.000          | 3.000          | 0.000   | 12.000  |
|            | L3        | 32 | 2.844 | 1.903   | 2.500  | 1.000          | 3.000          | 2.000          | 0.000   | 7.000   |
|            | L4        | 35 | 2.257 | 2.105   | 2.000  | 1.000          | 3.000          | 2.000          | 0.000   | 11.000  |
|            | M1        | 31 | 2.032 | 1.560   | 2.000  | 1.000          | 3.000          | 2.000          | 0.000   | 6.000   |
|            | M2        | 26 | 1.962 | 1.371   | 2.000  | 1.000          | 2.000          | 1.000          | 0.000   | 7.000   |
|            | M3        | 19 | 2.842 | 4.549   | 2.000  | 1.000          | 3.000          | 2.000          | 0.000   | 21.000  |
|            | M4        | 17 | 2.471 | 1.419   | 2.000  | 1.000          | 3.000          | 2.000          | 1.000   | 6.000   |
|            | M5        | 15 | 2.067 | 1.668   | 2.000  | 1.000          | 3.000          | 2.000          | 0.000   | 7.000   |
|            | M6        | 13 | 2.385 | 2.434   | 2.000  | 1.000          | 2.000          | 1.000          | 1.000   | 10.000  |
|            | M7        | 8  | 2.500 | 1.690   | 2.000  | 1.000          | 4.000          | 3.000          | 1.000   | 5.000   |
|            | M8        | 2  | 2.500 | 0.707   | 2.500  | 2.000          | 3.000          | 1.000          | 2.000   | 3.000   |
| Total      | L1        | 47 | 2.404 | 2.998   | 1.000  | 1.000          | 3.000          | 2.000          | 0.000   | 16.000  |
|            | L2        | 42 | 2.929 | 3.095   | 2.000  | 1.000          | 4.000          | 3.000          | 0.000   | 15.000  |
|            | L3        | 45 | 3.133 | 3.057   | 2.000  | 1.000          | 4.000          | 3.000          | 0.000   | 13.000  |
|            | L4        | 46 | 2.174 | 2.360   | 2.000  | 1.000          | 3.000          | 2.000          | 0.000   | 11.000  |
|            | M1        | 42 | 2.143 | 3.057   | 1.000  | 1.000          | 2.000          | 1.000          | 0.000   | 19.000  |
|            | M2        | 35 | 1.771 | 1.308   | 2.000  | 1.000          | 2.000          | 1.000          | 0.000   | 7.000   |
|            | M3        | 31 | 2.548 | 4.202   | 2.000  | 0.000          | 3.000          | 3.000          | 0.000   | 21.000  |
|            | M4        | 25 | 1.960 | 1.567   | 2.000  | 1.000          | 3.000          | 2.000          | 0.000   | 6.000   |
|            | M5        | 22 | 1.864 | 1.552   | 2.000  | 1.000          | 2.000          | 1.000          | 0.000   | 7.000   |
|            | M6        | 16 | 2.250 | 2.266   | 2.000  | 1.000          | 2.000          | 1.000          | 0.000   | 10.000  |
|            | M7        | 9  | 2.333 | 1.658   | 2.000  | 1.000          | 3.000          | 2.000          | 1.000   | 5.000   |
|            | M8        | 2  | 2.500 | 0.707   | 2.500  | 2.000          | 3.000          | 1.000          | 2.000   | 3.000   |

Table S1b. Descriptive statistics: Cerebrospinal fluid (CSF) - Glucose [mg/dL].

| SMA type   | Injection | N  | Mean   | Std Dev | Median | Lower Quartile | Upper Quartile | Quartile Range | Minimum | Maximum |
|------------|-----------|----|--------|---------|--------|----------------|----------------|----------------|---------|---------|
| SMA type 2 | L1        | 13 | 62.462 | 5.797   | 61.000 | 60.000         | 67.000         | 7.000          | 53.000  | 72.000  |
|            | L2        | 9  | 59.889 | 3.480   | 59.000 | 57.000         | 61.000         | 4.000          | 56.000  | 66.000  |
|            | L3        | 13 | 62.692 | 5.721   | 62.000 | 59.000         | 67.000         | 8.000          | 53.000  | 70.000  |
|            | L4        | 11 | 62.091 | 6.426   | 60.000 | 57.000         | 69.000         | 12.000         | 53.000  | 71.000  |
|            | M1        | 11 | 60.182 | 4.916   | 60.000 | 57.000         | 64.000         | 7.000          | 51.000  | 67.000  |
|            | M2        | 10 | 60.500 | 4.927   | 60.500 | 57.000         | 65.000         | 8.000          | 54.000  | 69.000  |
|            | M3        | 12 | 60.083 | 4.776   | 60.500 | 56.000         | 64.000         | 8.000          | 52.000  | 66.000  |
|            | M4        | 8  | 60.125 | 3.137   | 59.500 | 57.500         | 62.000         | 4.500          | 57.000  | 66.000  |
|            | M5        | 7  | 59.286 | 3.946   | 59.000 | 57.000         | 63.000         | 6.000          | 53.000  | 65.000  |
|            | M6        | 3  | 62.000 | 7.937   | 59.000 | 56.000         | 71.000         | 15.000         | 56.000  | 71.000  |
|            | M7        | 1  | 62.000 | .       | 62.000 | 62.000         | 62.000         | 0.000          | 62.000  | 62.000  |
|            | M8        | 0  | .      | .       | .      | .              | .              | .              | .       | .       |
| SMA type 3 | L1        | 34 | 65.676 | 5.420   | 65.500 | 60.000         | 70.000         | 10.000         | 56.000  | 75.000  |
|            | L2        | 33 | 64.909 | 5.997   | 64.000 | 61.000         | 68.000         | 7.000          | 52.000  | 78.000  |
|            | L3        | 31 | 64.677 | 6.274   | 65.000 | 59.000         | 70.000         | 11.000         | 55.000  | 78.000  |
|            | L4        | 35 | 64.514 | 4.829   | 64.000 | 61.000         | 69.000         | 8.000          | 55.000  | 74.000  |
|            | M1        | 31 | 63.710 | 6.827   | 62.000 | 60.000         | 67.000         | 7.000          | 51.000  | 81.000  |
|            | M2        | 25 | 62.800 | 5.888   | 60.000 | 58.000         | 67.000         | 9.000          | 56.000  | 75.000  |
|            | M3        | 19 | 64.632 | 7.826   | 63.000 | 57.000         | 71.000         | 14.000         | 55.000  | 84.000  |
|            | M4        | 17 | 64.176 | 8.233   | 62.000 | 60.000         | 64.000         | 4.000          | 55.000  | 88.000  |
|            | M5        | 15 | 63.000 | 5.593   | 62.000 | 60.000         | 66.000         | 6.000          | 53.000  | 74.000  |
|            | M6        | 13 | 63.615 | 6.715   | 64.000 | 59.000         | 68.000         | 9.000          | 53.000  | 74.000  |
|            | M7        | 8  | 63.375 | 7.170   | 64.000 | 57.500         | 68.000         | 10.500         | 53.000  | 75.000  |
|            | M8        | 2  | 62.000 | 2.828   | 62.000 | 60.000         | 64.000         | 4.000          | 60.000  | 64.000  |
| Total      | L1        | 47 | 64.787 | 5.653   | 64.000 | 60.000         | 70.000         | 10.000         | 53.000  | 75.000  |
|            | L2        | 42 | 63.833 | 5.897   | 63.000 | 59.000         | 67.000         | 8.000          | 52.000  | 78.000  |
|            | L3        | 44 | 64.091 | 6.118   | 63.000 | 59.000         | 69.500         | 10.500         | 53.000  | 78.000  |
|            | L4        | 46 | 63.935 | 5.281   | 64.000 | 60.000         | 69.000         | 9.000          | 53.000  | 74.000  |
|            | M1        | 42 | 62.786 | 6.517   | 62.000 | 59.000         | 66.000         | 7.000          | 51.000  | 81.000  |
|            | M2        | 35 | 62.143 | 5.658   | 60.000 | 58.000         | 66.000         | 8.000          | 54.000  | 75.000  |
|            | M3        | 31 | 62.871 | 7.084   | 63.000 | 57.000         | 66.000         | 9.000          | 52.000  | 84.000  |
|            | M4        | 25 | 62.880 | 7.196   | 61.000 | 58.000         | 64.000         | 6.000          | 55.000  | 88.000  |
|            | M5        | 22 | 61.818 | 5.333   | 61.000 | 58.000         | 64.000         | 6.000          | 53.000  | 74.000  |
|            | M6        | 16 | 63.313 | 6.700   | 63.500 | 58.000         | 69.000         | 11.000         | 53.000  | 74.000  |
|            | M7        | 9  | 63.222 | 6.723   | 63.000 | 58.000         | 67.000         | 9.000          | 53.000  | 75.000  |
|            | M8        | 2  | 62.000 | 2.828   | 62.000 | 60.000         | 64.000         | 4.000          | 60.000  | 64.000  |

Table S1c. Descriptive statistics: Cerebrospinal fluid (CSF) – Lactate [mmol/L].

| SMA type   | Injection | N  | Mean  | Std Dev | Median | Lower Quartile | Upper Quartile | Quartile Range | Minimum | Maximum |
|------------|-----------|----|-------|---------|--------|----------------|----------------|----------------|---------|---------|
| SMA type 2 | L1        | 13 | 1.346 | 0.185   | 1.300  | 1.300          | 1.500          | 0.200          | 1.000   | 1.700   |
|            | L2        | 9  | 1.322 | 0.148   | 1.300  | 1.200          | 1.400          | 0.200          | 1.200   | 1.600   |
|            | L3        | 13 | 1.423 | 0.174   | 1.400  | 1.300          | 1.500          | 0.200          | 1.200   | 1.800   |
|            | L4        | 11 | 1.409 | 0.176   | 1.400  | 1.300          | 1.500          | 0.200          | 1.100   | 1.700   |
|            | M1        | 11 | 1.427 | 0.185   | 1.400  | 1.300          | 1.500          | 0.200          | 1.100   | 1.800   |
|            | M2        | 10 | 1.280 | 0.187   | 1.300  | 1.100          | 1.400          | 0.300          | 1.000   | 1.600   |
|            | M3        | 12 | 1.425 | 0.201   | 1.350  | 1.250          | 1.600          | 0.350          | 1.200   | 1.700   |
|            | M4        | 8  | 1.400 | 0.120   | 1.400  | 1.350          | 1.450          | 0.100          | 1.200   | 1.600   |
|            | M5        | 7  | 1.471 | 0.138   | 1.500  | 1.300          | 1.600          | 0.300          | 1.300   | 1.600   |
|            | M6        | 3  | 1.433 | 0.058   | 1.400  | 1.400          | 1.500          | 0.100          | 1.400   | 1.500   |
|            | M7        | 1  | 1.500 | .       | 1.500  | 1.500          | 1.500          | 0.000          | 1.500   | 1.500   |
|            | M8        | 0  | .     | .       | .      | .              | .              | .              | .       | .       |
| SMA type 3 | L1        | 34 | 1.574 | 0.265   | 1.600  | 1.400          | 1.700          | 0.300          | 1.100   | 2.500   |
|            | L2        | 33 | 1.558 | 0.248   | 1.600  | 1.300          | 1.700          | 0.400          | 1.200   | 2.300   |
|            | L3        | 31 | 1.629 | 0.289   | 1.500  | 1.400          | 1.900          | 0.500          | 1.000   | 2.200   |
|            | L4        | 35 | 1.569 | 0.261   | 1.500  | 1.400          | 1.800          | 0.400          | 1.100   | 2.100   |
|            | M1        | 31 | 1.648 | 0.268   | 1.600  | 1.500          | 1.700          | 0.200          | 1.100   | 2.200   |
|            | M2        | 25 | 1.552 | 0.262   | 1.500  | 1.400          | 1.700          | 0.300          | 1.100   | 2.300   |
|            | M3        | 19 | 1.616 | 0.269   | 1.600  | 1.400          | 1.800          | 0.400          | 1.100   | 2.100   |
|            | M4        | 17 | 1.647 | 0.274   | 1.700  | 1.500          | 1.700          | 0.200          | 1.200   | 2.300   |
|            | M5        | 15 | 1.627 | 0.228   | 1.600  | 1.500          | 1.700          | 0.200          | 1.200   | 2.200   |
|            | M6        | 13 | 1.508 | 0.193   | 1.500  | 1.400          | 1.500          | 0.100          | 1.300   | 1.900   |
|            | M7        | 8  | 1.575 | 0.328   | 1.500  | 1.350          | 1.750          | 0.400          | 1.200   | 2.200   |
|            | M8        | 2  | 1.450 | 0.354   | 1.450  | 1.200          | 1.700          | 0.500          | 1.200   | 1.700   |
| Total      | L1        | 47 | 1.511 | 0.265   | 1.500  | 1.300          | 1.700          | 0.400          | 1.000   | 2.500   |
|            | L2        | 42 | 1.507 | 0.248   | 1.500  | 1.300          | 1.700          | 0.400          | 1.200   | 2.300   |
|            | L3        | 44 | 1.568 | 0.275   | 1.500  | 1.400          | 1.800          | 0.400          | 1.000   | 2.200   |
|            | L4        | 46 | 1.530 | 0.251   | 1.500  | 1.400          | 1.700          | 0.300          | 1.100   | 2.100   |
|            | M1        | 42 | 1.590 | 0.266   | 1.600  | 1.500          | 1.700          | 0.200          | 1.100   | 2.200   |
|            | M2        | 35 | 1.474 | 0.270   | 1.500  | 1.300          | 1.600          | 0.300          | 1.000   | 2.300   |
|            | M3        | 31 | 1.542 | 0.259   | 1.600  | 1.300          | 1.700          | 0.400          | 1.100   | 2.100   |
|            | M4        | 25 | 1.568 | 0.261   | 1.500  | 1.400          | 1.700          | 0.300          | 1.200   | 2.300   |
|            | M5        | 22 | 1.577 | 0.214   | 1.600  | 1.400          | 1.700          | 0.300          | 1.200   | 2.200   |
|            | M6        | 16 | 1.494 | 0.177   | 1.450  | 1.400          | 1.500          | 0.100          | 1.300   | 1.900   |
|            | M7        | 9  | 1.567 | 0.308   | 1.500  | 1.400          | 1.600          | 0.200          | 1.200   | 2.200   |
|            | M8        | 2  | 1.450 | 0.354   | 1.450  | 1.200          | 1.700          | 0.500          | 1.200   | 1.700   |

**Table S1d. Descriptive statistics: Cerebrospinal fluid (CSF) – Total protein [mg/dL].**

| SMA type   | Injection | N  | Mean   | Std Dev | Median | Lower Quartile | Upper Quartile | Quartile Range | Minimum | Maximum |
|------------|-----------|----|--------|---------|--------|----------------|----------------|----------------|---------|---------|
| SMA type 2 | L1        | 13 | 34.077 | 8.616   | 35.000 | 28.000         | 39.000         | 11.000         | 19.000  | 46.000  |
|            | L2        | 9  | 36.889 | 8.283   | 38.000 | 35.000         | 41.000         | 6.000          | 24.000  | 50.000  |
|            | L3        | 13 | 36.385 | 11.288  | 38.000 | 29.000         | 41.000         | 12.000         | 15.000  | 54.000  |
|            | L4        | 11 | 34.455 | 11.970  | 32.000 | 25.000         | 43.000         | 18.000         | 18.000  | 59.000  |
|            | M1        | 11 | 36.909 | 9.944   | 32.000 | 29.000         | 45.000         | 16.000         | 24.000  | 53.000  |
|            | M2        | 10 | 40.800 | 13.054  | 37.500 | 32.000         | 50.000         | 18.000         | 24.000  | 67.000  |
|            | M3        | 12 | 39.583 | 16.262  | 41.000 | 26.500         | 48.500         | 22.000         | 15.000  | 76.000  |
|            | M4        | 8  | 38.500 | 13.784  | 32.500 | 30.500         | 45.500         | 15.000         | 24.000  | 67.000  |
|            | M5        | 7  | 35.286 | 12.230  | 33.000 | 25.000         | 45.000         | 20.000         | 25.000  | 58.000  |
|            | M6        | 3  | 28.667 | 3.215   | 30.000 | 25.000         | 31.000         | 6.000          | 25.000  | 31.000  |
|            | M7        | 1  | 26.000 | .       | 26.000 | 26.000         | 26.000         | 0.000          | 26.000  | 26.000  |
|            | M8        | 0  | .      | .       | .      | .              | .              | .              | .       | .       |
| SMA type 3 | L1        | 34 | 41.882 | 12.416  | 39.000 | 32.000         | 52.000         | 20.000         | 26.000  | 72.000  |
|            | L2        | 33 | 43.030 | 13.660  | 43.000 | 32.000         | 51.000         | 19.000         | 23.000  | 81.000  |
|            | L3        | 31 | 41.839 | 13.984  | 36.000 | 31.000         | 54.000         | 23.000         | 25.000  | 80.000  |
|            | L4        | 35 | 41.743 | 13.663  | 38.000 | 31.000         | 53.000         | 22.000         | 23.000  | 75.000  |
|            | M1        | 31 | 41.903 | 12.931  | 42.000 | 31.000         | 50.000         | 19.000         | 23.000  | 78.000  |
|            | M2        | 25 | 42.120 | 14.443  | 36.000 | 31.000         | 51.000         | 20.000         | 26.000  | 74.000  |
|            | M3        | 19 | 43.737 | 12.679  | 41.000 | 31.000         | 53.000         | 22.000         | 26.000  | 62.000  |
|            | M4        | 17 | 46.529 | 12.420  | 43.000 | 37.000         | 54.000         | 17.000         | 29.000  | 73.000  |
|            | M5        | 15 | 47.867 | 12.409  | 48.000 | 38.000         | 61.000         | 23.000         | 30.000  | 69.000  |
|            | M6        | 13 | 49.615 | 15.305  | 51.000 | 39.000         | 56.000         | 17.000         | 29.000  | 78.000  |
|            | M7        | 8  | 48.000 | 12.705  | 44.000 | 37.500         | 59.500         | 22.000         | 34.000  | 68.000  |
|            | M8        | 2  | 70.000 | 7.071   | 70.000 | 65.000         | 75.000         | 10.000         | 65.000  | 75.000  |
| Total      | L1        | 47 | 39.723 | 11.934  | 38.000 | 32.000         | 46.000         | 14.000         | 19.000  | 72.000  |
|            | L2        | 42 | 41.714 | 12.866  | 40.000 | 32.000         | 50.000         | 18.000         | 23.000  | 81.000  |
|            | L3        | 44 | 40.227 | 13.354  | 37.500 | 30.000         | 49.500         | 19.500         | 15.000  | 80.000  |
|            | L4        | 46 | 40.000 | 13.519  | 37.000 | 30.000         | 50.000         | 20.000         | 18.000  | 75.000  |
|            | M1        | 42 | 40.595 | 12.305  | 38.500 | 30.000         | 49.000         | 19.000         | 23.000  | 78.000  |
|            | M2        | 35 | 41.743 | 13.883  | 36.000 | 32.000         | 51.000         | 19.000         | 24.000  | 74.000  |
|            | M3        | 31 | 42.129 | 14.059  | 41.000 | 29.000         | 52.000         | 23.000         | 15.000  | 76.000  |
|            | M4        | 25 | 43.960 | 13.148  | 43.000 | 33.000         | 52.000         | 19.000         | 24.000  | 73.000  |
|            | M5        | 22 | 43.864 | 13.467  | 42.000 | 33.000         | 53.000         | 20.000         | 25.000  | 69.000  |
|            | M6        | 16 | 45.688 | 16.127  | 41.500 | 30.500         | 55.500         | 25.000         | 25.000  | 78.000  |
|            | M7        | 9  | 45.556 | 13.965  | 42.000 | 36.000         | 58.000         | 22.000         | 26.000  | 68.000  |
|            | M8        | 2  | 70.000 | 7.071   | 70.000 | 65.000         | 75.000         | 10.000         | 65.000  | 75.000  |

Table S1e. Descriptive statistics: White blood cell (WBC) count [number/nL].

| SMA type   | Injection | N     | Mean  | Std Dev | Median | Lower Quartile | Upper Quartile | Quartile Range | Minimum | Maximum |
|------------|-----------|-------|-------|---------|--------|----------------|----------------|----------------|---------|---------|
| SMA type 2 | L1        | 13    | 7.161 | 2.192   | 6.690  | 5.810          | 8.520          | 2.710          | 3.920   | 11.730  |
|            | L2        | 11    | 7.266 | 2.221   | 7.220  | 4.800          | 9.570          | 4.770          | 4.090   | 10.850  |
|            | L3        | 12    | 6.471 | 1.845   | 6.485  | 4.870          | 7.835          | 2.965          | 3.990   | 10.080  |
|            | L4        | 12    | 7.867 | 2.937   | 6.780  | 5.735          | 9.975          | 4.240          | 4.970   | 14.610  |
|            | M1        | 11    | 7.935 | 2.264   | 7.550  | 6.400          | 10.290         | 3.890          | 4.000   | 11.030  |
|            | M2        | 12    | 7.139 | 2.498   | 6.155  | 5.115          | 9.405          | 4.290          | 4.630   | 11.950  |
|            | M3        | 10    | 7.392 | 2.324   | 8.135  | 4.740          | 9.180          | 4.440          | 4.080   | 11.030  |
|            | M4        | 8     | 7.321 | 3.151   | 6.385  | 5.060          | 10.005         | 4.945          | 3.260   | 12.410  |
|            | M5        | 6     | 7.202 | 1.645   | 7.585  | 6.330          | 7.810          | 1.480          | 4.510   | 9.390   |
|            | M6        | 2     | 9.710 | 2.843   | 9.710  | 7.700          | 11.720         | 4.020          | 7.700   | 11.720  |
|            | M7        | 0     | .     | .       | .      | .              | .              | .              | .       | .       |
|            | M8        | 0     | .     | .       | .      | .              | .              | .              | .       | .       |
| SMA type 3 | L1        | 35    | 7.099 | 1.823   | 6.710  | 5.750          | 7.600          | 1.850          | 4.640   | 11.870  |
|            | L2        | 22    | 6.691 | 1.811   | 6.475  | 5.250          | 7.870          | 2.620          | 4.200   | 10.800  |
|            | L3        | 21    | 7.222 | 2.052   | 6.520  | 5.830          | 8.190          | 2.360          | 5.360   | 12.980  |
|            | L4        | 21    | 6.738 | 1.903   | 6.190  | 5.560          | 6.670          | 1.110          | 4.740   | 12.290  |
|            | M1        | 28    | 7.030 | 1.657   | 6.490  | 5.790          | 8.275          | 2.485          | 5.050   | 10.850  |
|            | M2        | 27    | 7.321 | 1.833   | 7.040  | 5.470          | 8.870          | 3.400          | 4.870   | 11.310  |
|            | M3        | 19    | 6.738 | 1.389   | 6.160  | 5.860          | 7.600          | 1.740          | 5.480   | 10.620  |
|            | M4        | 16    | 7.504 | 2.094   | 7.165  | 6.005          | 8.630          | 2.625          | 4.330   | 11.480  |
|            | M5        | 17    | 7.442 | 2.053   | 7.470  | 5.760          | 8.760          | 3.000          | 3.910   | 11.270  |
|            | M6        | 14    | 7.513 | 2.296   | 7.360  | 5.570          | 9.230          | 3.660          | 4.950   | 13.200  |
|            | M7        | 8     | 7.471 | 2.362   | 6.695  | 6.365          | 8.040          | 1.675          | 4.830   | 12.740  |
|            | M8        | 2     | 7.180 | 0.226   | 7.180  | 7.020          | 7.340          | 0.320          | 7.020   | 7.340   |
| Total      | L1        | 48    | 7.116 | 1.906   | 6.700  | 5.755          | 7.935          | 2.180          | 3.920   | 11.870  |
|            | L2        | 33    | 6.883 | 1.941   | 6.890  | 5.250          | 8.020          | 2.770          | 4.090   | 10.850  |
|            | L3        | 33    | 6.949 | 1.984   | 6.520  | 5.770          | 7.930          | 2.160          | 3.990   | 12.980  |
|            | L4        | 33    | 7.148 | 2.352   | 6.290  | 5.560          | 7.530          | 1.970          | 4.740   | 14.610  |
|            | M1        | 39    | 7.285 | 1.863   | 6.760  | 5.920          | 8.550          | 2.630          | 4.000   | 11.030  |
|            | M2        | 39    | 7.265 | 2.028   | 6.990  | 5.370          | 9.050          | 3.680          | 4.630   | 11.950  |
|            | M3        | 29    | 6.963 | 1.754   | 6.240  | 5.860          | 8.110          | 2.250          | 4.080   | 11.030  |
|            | M4        | 24    | 7.443 | 2.427   | 6.970  | 5.530          | 9.205          | 3.675          | 3.260   | 12.410  |
|            | M5        | 23    | 7.380 | 1.922   | 7.470  | 5.760          | 8.760          | 3.000          | 3.910   | 11.270  |
|            | M6        | 16    | 7.788 | 2.382   | 7.790  | 5.710          | 9.300          | 3.590          | 4.950   | 13.200  |
| M7         | 8         | 7.471 | 2.362 | 6.695   | 6.365  | 8.040          | 1.675          | 4.830          | 12.740  |         |
| M8         | 2         | 7.180 | 0.226 | 7.180   | 7.020  | 7.340          | 0.320          | 7.020          | 7.340   |         |

**Table S1f. Descriptive statistics: Platelet count [number/nL].**

|            | <b>Injection</b> | <b>N</b> | <b>Mean</b> | <b>Std Dev</b> | <b>Median</b> | <b>Lower Quartile</b> | <b>Upper Quartile</b> | <b>Quartile Range</b> | <b>Minimum</b> | <b>Maximum</b> |
|------------|------------------|----------|-------------|----------------|---------------|-----------------------|-----------------------|-----------------------|----------------|----------------|
| SMA type 2 | L1               | 13       | 315.154     | 121.951        | 331.000       | 232.000               | 393.000               | 161.000               | 103.000        | 477.000        |
|            | L2               | 11       | 309.909     | 118.419        | 320.000       | 233.000               | 413.000               | 180.000               | 81.000         | 465.000        |
|            | L3               | 12       | 290.750     | 93.937         | 317.000       | 263.000               | 345.500               | 82.500                | 66.000         | 417.000        |
|            | L4               | 12       | 312.250     | 141.532        | 316.500       | 234.000               | 378.000               | 144.000               | 87.000         | 596.000        |
|            | M1               | 11       | 306.636     | 96.266         | 311.000       | 246.000               | 356.000               | 110.000               | 164.000        | 509.000        |
|            | M2               | 12       | 291.000     | 115.548        | 294.000       | 236.500               | 356.500               | 120.000               | 61.000         | 497.000        |
|            | M3               | 10       | 310.700     | 103.144        | 321.500       | 263.000               | 367.000               | 104.000               | 82.000         | 442.000        |
|            | M4               | 8        | 287.000     | 114.252        | 270.000       | 234.500               | 345.500               | 111.000               | 101.000        | 495.000        |
|            | M5               | 6        | 271.333     | 92.294         | 274.000       | 242.000               | 338.000               | 96.000                | 116.000        | 384.000        |
|            | M6               | 2        | 294.500     | 61.518         | 294.500       | 251.000               | 338.000               | 87.000                | 251.000        | 338.000        |
|            | M7               | 0        | .           | .              | .             | .                     | .                     | .                     | .              | .              |
|            | M8               | 0        | .           | .              | .             | .                     | .                     | .                     | .              | .              |
| SMA type 3 | L1               | 35       | 265.943     | 50.887         | 254.000       | 228.000               | 307.000               | 79.000                | 176.000        | 368.000        |
|            | L2               | 22       | 259.182     | 48.040         | 250.500       | 225.000               | 300.000               | 75.000                | 165.000        | 336.000        |
|            | L3               | 21       | 261.048     | 52.298         | 252.000       | 232.000               | 279.000               | 47.000                | 173.000        | 376.000        |
|            | L4               | 21       | 264.095     | 55.314         | 251.000       | 215.000               | 318.000               | 103.000               | 169.000        | 353.000        |
|            | M1               | 28       | 278.250     | 60.863         | 265.500       | 229.500               | 316.500               | 87.000                | 198.000        | 430.000        |
|            | M2               | 27       | 277.444     | 66.449         | 273.000       | 226.000               | 302.000               | 76.000                | 200.000        | 532.000        |
|            | M3               | 19       | 262.211     | 57.018         | 251.000       | 226.000               | 313.000               | 87.000                | 176.000        | 378.000        |
|            | M4               | 16       | 264.063     | 44.895         | 258.500       | 222.000               | 311.000               | 89.000                | 201.000        | 328.000        |
|            | M5               | 17       | 260.235     | 49.127         | 257.000       | 228.000               | 288.000               | 60.000                | 151.000        | 342.000        |
|            | M6               | 14       | 267.000     | 46.347         | 256.000       | 240.000               | 302.000               | 62.000                | 193.000        | 368.000        |
|            | M7               | 8        | 267.250     | 43.863         | 264.500       | 228.500               | 290.500               | 62.000                | 220.000        | 351.000        |
|            | M8               | 2        | 237.500     | 19.092         | 237.500       | 224.000               | 251.000               | 27.000                | 224.000        | 251.000        |
| Total      | L1               | 48       | 279.271     | 78.478         | 268.500       | 228.000               | 330.500               | 102.500               | 103.000        | 477.000        |
|            | L2               | 33       | 276.091     | 80.539         | 260.000       | 226.000               | 322.000               | 96.000                | 81.000         | 465.000        |
|            | L3               | 33       | 271.848     | 70.379         | 253.000       | 246.000               | 327.000               | 81.000                | 66.000         | 417.000        |
|            | L4               | 33       | 281.606     | 96.703         | 284.000       | 215.000               | 325.000               | 110.000               | 87.000         | 596.000        |
|            | M1               | 39       | 286.256     | 72.375         | 275.000       | 234.000               | 330.000               | 96.000                | 164.000        | 509.000        |
|            | M2               | 39       | 281.615     | 83.223         | 275.000       | 226.000               | 316.000               | 90.000                | 61.000         | 532.000        |
|            | M3               | 29       | 278.931     | 77.844         | 263.000       | 231.000               | 332.000               | 101.000               | 82.000         | 442.000        |
|            | M4               | 24       | 271.708     | 73.548         | 261.500       | 225.500               | 317.500               | 92.000                | 101.000        | 495.000        |
|            | M5               | 23       | 263.130     | 60.959         | 259.000       | 228.000               | 296.000               | 68.000                | 116.000        | 384.000        |
|            | M6               | 16       | 270.438     | 46.927         | 256.000       | 241.000               | 309.500               | 68.500                | 193.000        | 368.000        |
|            | M7               | 8        | 267.250     | 43.863         | 264.500       | 228.500               | 290.500               | 62.000                | 220.000        | 351.000        |
|            | M8               | 2        | 237.500     | 19.092         | 237.500       | 224.000               | 251.000               | 27.000                | 224.000        | 251.000        |

Table S1g. Descriptive statistics: International normalized ratio (INR).

| SMA type   | Injection | N  | Mean  | Std Dev | Median | Lower Quartile | Upper Quartile | Quartile Range | Minimum | Maximum |
|------------|-----------|----|-------|---------|--------|----------------|----------------|----------------|---------|---------|
| SMA type 2 | L1        | 12 | 1.020 | 0.062   | 1.020  | 0.970          | 1.075          | 0.105          | 0.920   | 1.120   |
|            | L2        | 11 | 1.019 | 0.049   | 1.020  | 0.960          | 1.070          | 0.110          | 0.950   | 1.090   |
|            | L3        | 10 | 1.034 | 0.039   | 1.035  | 1.000          | 1.050          | 0.050          | 0.990   | 1.120   |
|            | L4        | 12 | 1.031 | 0.056   | 1.035  | 0.985          | 1.075          | 0.090          | 0.940   | 1.120   |
|            | M1        | 12 | 1.045 | 0.050   | 1.040  | 1.015          | 1.080          | 0.065          | 0.940   | 1.130   |
|            | M2        | 13 | 1.035 | 0.045   | 1.030  | 1.010          | 1.060          | 0.050          | 0.960   | 1.100   |
|            | M3        | 10 | 1.033 | 0.058   | 1.040  | 0.960          | 1.090          | 0.130          | 0.960   | 1.100   |
|            | M4        | 8  | 1.013 | 0.058   | 1.030  | 0.965          | 1.055          | 0.090          | 0.920   | 1.080   |
|            | M5        | 6  | 1.008 | 0.061   | 1.000  | 0.960          | 1.040          | 0.080          | 0.940   | 1.110   |
|            | M6        | 2  | 1.015 | 0.106   | 1.015  | 0.940          | 1.090          | 0.150          | 0.940   | 1.090   |
|            | M7        | 0  | .     | .       | .      | .              | .              | .              | .       | .       |
| SMA type 3 | L1        | 16 | 1.024 | 0.077   | 1.005  | 0.960          | 1.090          | 0.130          | 0.930   | 1.190   |
|            | L2        | 12 | 1.024 | 0.074   | 1.010  | 0.995          | 1.065          | 0.070          | 0.890   | 1.170   |
|            | L3        | 11 | 0.997 | 0.068   | 1.000  | 0.950          | 1.040          | 0.090          | 0.890   | 1.130   |
|            | L4        | 11 | 1.003 | 0.052   | 0.980  | 0.970          | 1.040          | 0.070          | 0.940   | 1.090   |
|            | M1        | 11 | 1.009 | 0.067   | 1.010  | 0.960          | 1.060          | 0.100          | 0.890   | 1.120   |
|            | M2        | 9  | 1.031 | 0.072   | 1.020  | 0.980          | 1.060          | 0.080          | 0.960   | 1.180   |
|            | M3        | 3  | 1.027 | 0.090   | 0.980  | 0.970          | 1.130          | 0.160          | 0.970   | 1.130   |
|            | M4        | 3  | 1.027 | 0.051   | 1.040  | 0.970          | 1.070          | 0.100          | 0.970   | 1.070   |
|            | M5        | 3  | 1.027 | 0.100   | 1.020  | 0.930          | 1.130          | 0.200          | 0.930   | 1.130   |
|            | M6        | 3  | 1.053 | 0.112   | 1.010  | 0.970          | 1.180          | 0.210          | 0.970   | 1.180   |
|            | M7        | 1  | 0.990 | .       | 0.990  | 0.990          | 0.990          | 0.000          | 0.990   | 0.990   |
| Total      | L1        | 28 | 1.022 | 0.070   | 1.020  | 0.960          | 1.075          | 0.115          | 0.920   | 1.190   |
|            | L2        | 23 | 1.022 | 0.062   | 1.010  | 0.990          | 1.070          | 0.080          | 0.890   | 1.170   |
|            | L3        | 21 | 1.015 | 0.058   | 1.020  | 0.990          | 1.040          | 0.050          | 0.890   | 1.130   |
|            | L4        | 23 | 1.017 | 0.055   | 1.010  | 0.980          | 1.060          | 0.080          | 0.940   | 1.120   |
|            | M1        | 23 | 1.028 | 0.060   | 1.030  | 0.990          | 1.070          | 0.080          | 0.890   | 1.130   |
|            | M2        | 22 | 1.034 | 0.056   | 1.025  | 0.990          | 1.060          | 0.070          | 0.960   | 1.180   |
|            | M3        | 13 | 1.032 | 0.062   | 1.020  | 0.970          | 1.090          | 0.120          | 0.960   | 1.130   |
|            | M4        | 11 | 1.016 | 0.054   | 1.030  | 0.970          | 1.070          | 0.100          | 0.920   | 1.080   |
|            | M5        | 9  | 1.014 | 0.070   | 1.000  | 0.960          | 1.040          | 0.080          | 0.930   | 1.130   |
|            | M6        | 5  | 1.038 | 0.097   | 1.010  | 0.970          | 1.090          | 0.120          | 0.940   | 1.180   |
|            | M7        | 1  | 0.990 | .       | 0.990  | 0.990          | 0.990          | 0.000          | 0.990   | 0.990   |



**Table S1h. Descriptive statistics: Activated partial thromboplastin time (aPTT) [s].**

| SMA type   | Injection | N  | Mean   | Std Dev | Median | Lower Quartile | Upper Quartile | Quartile Range | Minimum | Maximum |
|------------|-----------|----|--------|---------|--------|----------------|----------------|----------------|---------|---------|
| SMA type 2 | L1        | 12 | 28.842 | 2.580   | 29.000 | 27.550         | 30.900         | 3.350          | 24.300  | 32.100  |
|            | L2        | 11 | 28.745 | 2.745   | 28.200 | 26.600         | 31.800         | 5.200          | 25.100  | 33.200  |
|            | L3        | 10 | 28.490 | 2.801   | 28.850 | 26.700         | 31.100         | 4.400          | 23.300  | 32.200  |
|            | L4        | 12 | 28.183 | 2.609   | 29.050 | 25.600         | 30.150         | 4.550          | 24.400  | 32.500  |
|            | M1        | 12 | 28.325 | 1.483   | 28.450 | 27.250         | 29.450         | 2.200          | 26.000  | 30.800  |
|            | M2        | 13 | 29.115 | 1.875   | 29.500 | 27.100         | 29.900         | 2.800          | 26.800  | 33.300  |
|            | M3        | 10 | 28.400 | 2.251   | 27.900 | 26.500         | 30.100         | 3.600          | 25.800  | 32.100  |
|            | M4        | 8  | 27.150 | 1.918   | 27.900 | 25.150         | 28.750         | 3.600          | 24.500  | 29.100  |
|            | M5        | 6  | 26.833 | 3.065   | 28.050 | 23.200         | 28.800         | 5.600          | 22.800  | 30.100  |
|            | M6        | 2  | 22.800 | 1.131   | 22.800 | 22.000         | 23.600         | 1.600          | 22.000  | 23.600  |
|            | M7        | 0  | .      | .       | .      | .              | .              | .              | .       | .       |
| SMA type 3 | L1        | 16 | 27.519 | 3.125   | 27.450 | 25.200         | 29.650         | 4.450          | 20.900  | 32.900  |
|            | L2        | 11 | 28.082 | 2.635   | 28.100 | 26.200         | 30.500         | 4.300          | 24.000  | 32.500  |
|            | L3        | 11 | 27.064 | 2.480   | 26.700 | 25.500         | 29.100         | 3.600          | 23.100  | 31.800  |
|            | L4        | 11 | 27.500 | 2.986   | 27.300 | 24.800         | 30.500         | 5.700          | 22.700  | 31.800  |
|            | M1        | 11 | 27.255 | 2.977   | 28.000 | 25.200         | 29.800         | 4.600          | 20.900  | 30.700  |
|            | M2        | 9  | 29.444 | 3.472   | 29.700 | 28.500         | 32.400         | 3.900          | 22.000  | 33.300  |
|            | M3        | 3  | 30.533 | 5.193   | 31.300 | 25.000         | 35.300         | 10.300         | 25.000  | 35.300  |
|            | M4        | 3  | 29.400 | 3.315   | 30.900 | 25.600         | 31.700         | 6.100          | 25.600  | 31.700  |
|            | M5        | 3  | 28.367 | 4.600   | 30.400 | 23.100         | 31.600         | 8.500          | 23.100  | 31.600  |
|            | M6        | 3  | 31.433 | 1.626   | 31.100 | 30.000         | 33.200         | 3.200          | 30.000  | 33.200  |
|            | M7        | 1  | 30.800 | .       | 30.800 | 30.800         | 30.800         | 0.000          | 30.800  | 30.800  |
| Total      | L1        | 28 | 28.086 | 2.930   | 28.250 | 25.600         | 30.550         | 4.950          | 20.900  | 32.900  |
|            | L2        | 22 | 28.414 | 2.648   | 28.150 | 26.600         | 30.500         | 3.900          | 24.000  | 33.200  |
|            | L3        | 21 | 27.743 | 2.672   | 27.900 | 25.800         | 29.300         | 3.500          | 23.100  | 32.200  |
|            | L4        | 23 | 27.857 | 2.753   | 27.600 | 25.000         | 30.200         | 5.200          | 22.700  | 32.500  |
|            | M1        | 23 | 27.813 | 2.330   | 28.100 | 26.200         | 29.600         | 3.400          | 20.900  | 30.800  |
|            | M2        | 22 | 29.250 | 2.575   | 29.600 | 27.100         | 30.500         | 3.400          | 22.000  | 33.300  |
|            | M3        | 13 | 28.892 | 3.028   | 29.000 | 26.500         | 31.000         | 4.500          | 25.000  | 35.300  |
|            | M4        | 11 | 27.764 | 2.424   | 28.200 | 25.500         | 29.100         | 3.600          | 24.500  | 31.700  |
|            | M5        | 9  | 27.344 | 3.428   | 28.100 | 23.200         | 30.100         | 6.900          | 22.800  | 31.600  |
|            | M6        | 5  | 27.980 | 4.899   | 30.000 | 23.600         | 31.100         | 7.500          | 22.000  | 33.200  |
|            | M7        | 1  | 30.800 | .       | 30.800 | 30.800         | 30.800         | 0.000          | 30.800  | 30.800  |

Table S1i. Descriptive statistics: Creatinine [mg/dL].

| SMA type   | Injection | N     | Mean  | Std Dev | Median | Lower Quartile | Upper Quartile | Quartile Range | Minimum | Maximum |
|------------|-----------|-------|-------|---------|--------|----------------|----------------|----------------|---------|---------|
| SMA type 2 | L1        | 13    | 0.308 | 0.048   | 0.300  | 0.270          | 0.320          | 0.050          | 0.260   | 0.430   |
|            | L2        | 11    | 0.288 | 0.050   | 0.280  | 0.260          | 0.320          | 0.060          | 0.190   | 0.370   |
|            | L3        | 12    | 0.303 | 0.047   | 0.290  | 0.270          | 0.330          | 0.060          | 0.250   | 0.410   |
|            | L4        | 11    | 0.306 | 0.051   | 0.300  | 0.270          | 0.340          | 0.070          | 0.250   | 0.420   |
|            | M1        | 11    | 0.306 | 0.061   | 0.310  | 0.270          | 0.340          | 0.070          | 0.190   | 0.410   |
|            | M2        | 11    | 0.351 | 0.120   | 0.320  | 0.280          | 0.350          | 0.070          | 0.230   | 0.620   |
|            | M3        | 10    | 0.292 | 0.074   | 0.295  | 0.280          | 0.310          | 0.030          | 0.160   | 0.450   |
|            | M4        | 9     | 0.294 | 0.097   | 0.320  | 0.220          | 0.370          | 0.150          | 0.150   | 0.430   |
|            | M5        | 6     | 0.378 | 0.134   | 0.385  | 0.280          | 0.480          | 0.200          | 0.210   | 0.530   |
|            | M6        | 2     | 0.245 | 0.134   | 0.245  | 0.150          | 0.340          | 0.190          | 0.150   | 0.340   |
|            | M7        | 0     | .     | .       | .      | .              | .              | .              | .       | .       |
|            | M8        | 0     | .     | .       | .      | .              | .              | .              | .       | .       |
| SMA type 3 | L1        | 33    | 0.492 | 0.141   | 0.510  | 0.350          | 0.630          | 0.280          | 0.280   | 0.780   |
|            | L2        | 22    | 0.503 | 0.168   | 0.525  | 0.350          | 0.660          | 0.310          | 0.270   | 0.810   |
|            | L3        | 20    | 0.438 | 0.168   | 0.390  | 0.310          | 0.510          | 0.200          | 0.230   | 0.890   |
|            | L4        | 21    | 0.456 | 0.147   | 0.390  | 0.340          | 0.550          | 0.210          | 0.250   | 0.740   |
|            | M1        | 27    | 0.437 | 0.144   | 0.380  | 0.320          | 0.580          | 0.260          | 0.180   | 0.660   |
|            | M2        | 27    | 0.457 | 0.151   | 0.400  | 0.310          | 0.600          | 0.290          | 0.290   | 0.760   |
|            | M3        | 19    | 0.483 | 0.153   | 0.500  | 0.350          | 0.600          | 0.250          | 0.200   | 0.730   |
|            | M4        | 16    | 0.519 | 0.154   | 0.535  | 0.350          | 0.665          | 0.315          | 0.290   | 0.700   |
|            | M5        | 17    | 0.498 | 0.161   | 0.520  | 0.330          | 0.640          | 0.310          | 0.200   | 0.720   |
|            | M6        | 14    | 0.441 | 0.189   | 0.430  | 0.320          | 0.520          | 0.200          | 0.150   | 0.810   |
|            | M7        | 8     | 0.449 | 0.163   | 0.510  | 0.325          | 0.540          | 0.215          | 0.180   | 0.660   |
|            | M8        | 2     | 0.460 | 0.226   | 0.460  | 0.300          | 0.620          | 0.320          | 0.300   | 0.620   |
| Total      | L1        | 46    | 0.440 | 0.148   | 0.390  | 0.310          | 0.540          | 0.230          | 0.260   | 0.780   |
|            | L2        | 33    | 0.432 | 0.173   | 0.360  | 0.300          | 0.550          | 0.250          | 0.190   | 0.810   |
|            | L3        | 32    | 0.387 | 0.150   | 0.340  | 0.280          | 0.455          | 0.175          | 0.230   | 0.890   |
|            | L4        | 32    | 0.404 | 0.141   | 0.340  | 0.300          | 0.535          | 0.235          | 0.250   | 0.740   |
|            | M1        | 38    | 0.399 | 0.139   | 0.340  | 0.310          | 0.530          | 0.220          | 0.180   | 0.660   |
|            | M2        | 38    | 0.426 | 0.149   | 0.345  | 0.310          | 0.560          | 0.250          | 0.230   | 0.760   |
|            | M3        | 29    | 0.417 | 0.159   | 0.350  | 0.300          | 0.550          | 0.250          | 0.160   | 0.730   |
|            | M4        | 25    | 0.438 | 0.173   | 0.390  | 0.320          | 0.610          | 0.290          | 0.150   | 0.700   |
|            | M5        | 23    | 0.467 | 0.160   | 0.480  | 0.320          | 0.610          | 0.290          | 0.200   | 0.720   |
|            | M6        | 16    | 0.416 | 0.191   | 0.405  | 0.295          | 0.515          | 0.220          | 0.150   | 0.810   |
| M7         | 8         | 0.449 | 0.163 | 0.510   | 0.325  | 0.540          | 0.215          | 0.180          | 0.660   |         |
| M8         | 2         | 0.460 | 0.226 | 0.460   | 0.300  | 0.620          | 0.320          | 0.300          | 0.620   |         |

Table S1j. Descriptive statistics: Urea nitrogen [mg/dL].

| SMA type   | Injection | N      | Mean   | Std Dev | Median | Lower Quartile | Upper Quartile | Quartile Range | Minimum | Maximum |
|------------|-----------|--------|--------|---------|--------|----------------|----------------|----------------|---------|---------|
| SMA type 2 | L1        | 13     | 8.769  | 4.126   | 8.000  | 6.000          | 10.000         | 4.000          | 4.000   | 18.000  |
|            | L2        | 11     | 9.000  | 3.661   | 8.000  | 6.000          | 13.000         | 7.000          | 4.000   | 15.000  |
|            | L3        | 12     | 9.417  | 3.423   | 8.500  | 7.000          | 11.500         | 4.500          | 5.000   | 16.000  |
|            | L4        | 11     | 10.273 | 5.424   | 8.000  | 7.000          | 12.000         | 5.000          | 5.000   | 23.000  |
|            | M1        | 11     | 10.609 | 3.427   | 11.000 | 9.000          | 13.000         | 4.000          | 3.000   | 15.700  |
|            | M2        | 11     | 11.427 | 4.928   | 11.000 | 7.000          | 16.000         | 9.000          | 6.000   | 21.000  |
|            | M3        | 10     | 9.170  | 3.627   | 8.500  | 7.000          | 11.000         | 4.000          | 4.000   | 16.000  |
|            | M4        | 9      | 8.733  | 3.297   | 7.000  | 6.400          | 11.000         | 4.600          | 5.000   | 15.000  |
|            | M5        | 6      | 10.750 | 5.383   | 10.000 | 8.500          | 10.000         | 1.500          | 5.000   | 21.000  |
|            | M6        | 2      | 9.550  | 0.495   | 9.550  | 9.200          | 9.900          | 0.700          | 9.200   | 9.900   |
|            | M7        | 0      | .      | .       | .      | .              | .              | .              | .       | .       |
|            | M8        | 0      | .      | .       | .      | .              | .              | .              | .       | .       |
| SMA type 3 | L1        | 33     | 11.909 | 4.318   | 12.000 | 9.000          | 14.000         | 5.000          | 5.000   | 22.000  |
|            | L2        | 22     | 12.295 | 4.672   | 11.500 | 9.000          | 13.000         | 4.000          | 7.000   | 26.000  |
|            | L3        | 20     | 11.625 | 3.814   | 10.500 | 9.000          | 13.500         | 4.500          | 6.000   | 21.000  |
|            | L4        | 21     | 11.571 | 3.804   | 12.000 | 9.000          | 14.000         | 5.000          | 5.000   | 20.000  |
|            | M1        | 26     | 11.112 | 4.033   | 10.000 | 8.000          | 13.000         | 5.000          | 5.000   | 21.900  |
|            | M2        | 27     | 12.222 | 3.639   | 11.000 | 10.000         | 15.300         | 5.300          | 6.000   | 20.000  |
|            | M3        | 19     | 12.232 | 3.012   | 13.000 | 9.000          | 15.100         | 6.100          | 8.000   | 16.000  |
|            | M4        | 16     | 11.250 | 2.595   | 11.000 | 9.500          | 12.500         | 3.000          | 7.000   | 17.000  |
|            | M5        | 17     | 12.059 | 2.580   | 13.000 | 11.000         | 13.600         | 2.600          | 5.000   | 15.000  |
|            | M6        | 14     | 11.843 | 3.345   | 12.950 | 9.700          | 14.000         | 4.300          | 6.400   | 18.000  |
|            | M7        | 8      | 13.013 | 3.549   | 14.100 | 9.700          | 14.550         | 4.850          | 8.400   | 19.000  |
|            | M8        | 2      | 10.100 | 0.566   | 10.100 | 9.700          | 10.500         | 0.800          | 9.700   | 10.500  |
| Total      | L1        | 46     | 11.022 | 4.455   | 10.000 | 8.000          | 14.000         | 6.000          | 4.000   | 22.000  |
|            | L2        | 33     | 11.197 | 4.582   | 11.000 | 8.000          | 13.000         | 5.000          | 4.000   | 26.000  |
|            | L3        | 32     | 10.797 | 3.776   | 10.000 | 8.000          | 13.000         | 5.000          | 5.000   | 21.000  |
|            | L4        | 32     | 11.125 | 4.384   | 11.500 | 8.000          | 13.800         | 5.800          | 5.000   | 23.000  |
|            | M1        | 37     | 10.962 | 3.822   | 10.000 | 9.000          | 13.000         | 4.000          | 3.000   | 21.900  |
|            | M2        | 38     | 11.992 | 4.000   | 11.000 | 9.300          | 15.300         | 6.000          | 6.000   | 21.000  |
|            | M3        | 29     | 11.176 | 3.500   | 11.000 | 9.000          | 14.000         | 5.000          | 4.000   | 16.000  |
|            | M4        | 25     | 10.344 | 3.058   | 11.000 | 8.000          | 12.000         | 4.000          | 5.000   | 17.000  |
|            | M5        | 23     | 11.717 | 3.431   | 12.000 | 10.000         | 13.600         | 3.600          | 5.000   | 21.000  |
|            | M6        | 16     | 11.556 | 3.214   | 11.800 | 9.450          | 14.000         | 4.550          | 6.400   | 18.000  |
| M7         | 8         | 13.013 | 3.549  | 14.100  | 9.700  | 14.550         | 4.850          | 8.400          | 19.000  |         |
| M8         | 2         | 10.100 | 0.566  | 10.100  | 9.700  | 10.500         | 0.800          | 9.700          | 10.500  |         |

Table S1k. Descriptive statistics: Aspartate aminotransferase (AST) [U/L].

| SMA type   | Injection | N      | Mean   | Std Dev | Median | Lower Quartile | Upper Quartile | Quartile Range | Minimum | Maximum |
|------------|-----------|--------|--------|---------|--------|----------------|----------------|----------------|---------|---------|
| SMA type 2 | L1        | 13     | 21.000 | 8.926   | 19.000 | 15.000         | 26.000         | 11.000         | 11.000  | 39.000  |
|            | L2        | 11     | 16.727 | 6.930   | 15.000 | 11.000         | 24.000         | 13.000         | 9.000   | 30.000  |
|            | L3        | 12     | 18.500 | 9.318   | 15.500 | 12.000         | 23.500         | 11.500         | 8.000   | 41.000  |
|            | L4        | 11     | 18.182 | 7.653   | 17.000 | 14.000         | 22.000         | 8.000          | 9.000   | 38.000  |
|            | M1        | 11     | 16.091 | 8.227   | 14.000 | 12.000         | 16.000         | 4.000          | 6.000   | 36.000  |
|            | M2        | 10     | 18.500 | 8.236   | 17.500 | 12.000         | 23.000         | 11.000         | 7.000   | 34.000  |
|            | M3        | 10     | 17.900 | 10.170  | 14.000 | 10.000         | 24.000         | 14.000         | 7.000   | 38.000  |
|            | M4        | 9      | 17.667 | 6.103   | 17.000 | 13.000         | 20.000         | 7.000          | 12.000  | 30.000  |
|            | M5        | 6      | 17.500 | 7.007   | 15.500 | 13.000         | 18.000         | 5.000          | 12.000  | 31.000  |
|            | M6        | 2      | 29.500 | 6.364   | 29.500 | 25.000         | 34.000         | 9.000          | 25.000  | 34.000  |
|            | M7        | 0      | .      | .       | .      | .              | .              | .              | .       | .       |
|            | M8        | 0      | .      | .       | .      | .              | .              | .              | .       | .       |
| SMA type 3 | L1        | 33     | 28.485 | 13.067  | 25.000 | 18.000         | 36.000         | 18.000         | 11.000  | 72.000  |
|            | L2        | 22     | 23.409 | 10.326  | 22.000 | 16.000         | 31.000         | 15.000         | 7.000   | 43.000  |
|            | L3        | 20     | 23.650 | 11.962  | 20.500 | 14.000         | 29.000         | 15.000         | 10.000  | 52.000  |
|            | L4        | 21     | 26.000 | 11.798  | 22.000 | 17.000         | 35.000         | 18.000         | 13.000  | 59.000  |
|            | M1        | 26     | 24.577 | 8.686   | 23.000 | 17.000         | 30.000         | 13.000         | 14.000  | 49.000  |
|            | M2        | 27     | 28.815 | 24.595  | 23.000 | 19.000         | 28.000         | 9.000          | 12.000  | 142.000 |
|            | M3        | 19     | 30.684 | 24.752  | 23.000 | 19.000         | 33.000         | 14.000         | 14.000  | 124.000 |
|            | M4        | 16     | 32.688 | 19.969  | 28.000 | 20.500         | 39.500         | 19.000         | 12.000  | 92.000  |
|            | M5        | 17     | 35.118 | 25.522  | 28.000 | 19.000         | 39.000         | 20.000         | 9.000   | 111.000 |
|            | M6        | 14     | 31.500 | 19.417  | 26.500 | 18.000         | 35.000         | 17.000         | 15.000  | 88.000  |
|            | M7        | 8      | 38.000 | 25.428  | 28.500 | 20.500         | 49.000         | 28.500         | 16.000  | 92.000  |
|            | M8        | 2      | 32.500 | 12.021  | 32.500 | 24.000         | 41.000         | 17.000         | 24.000  | 41.000  |
| Total      | L1        | 46     | 26.370 | 12.421  | 24.500 | 17.000         | 33.000         | 16.000         | 11.000  | 72.000  |
|            | L2        | 33     | 21.182 | 9.758   | 20.000 | 13.000         | 27.000         | 14.000         | 7.000   | 43.000  |
|            | L3        | 32     | 21.719 | 11.177  | 20.000 | 13.500         | 25.500         | 12.000         | 8.000   | 52.000  |
|            | L4        | 32     | 23.313 | 11.087  | 19.000 | 16.000         | 28.500         | 12.500         | 9.000   | 59.000  |
|            | M1        | 37     | 22.054 | 9.309   | 20.000 | 16.000         | 29.000         | 13.000         | 6.000   | 49.000  |
|            | M2        | 37     | 26.027 | 21.804  | 22.000 | 17.000         | 27.000         | 10.000         | 7.000   | 142.000 |
|            | M3        | 29     | 26.276 | 21.572  | 22.000 | 15.000         | 31.000         | 16.000         | 7.000   | 124.000 |
|            | M4        | 25     | 27.280 | 17.771  | 22.000 | 16.000         | 31.000         | 15.000         | 12.000  | 92.000  |
|            | M5        | 23     | 30.522 | 23.397  | 25.000 | 15.000         | 34.000         | 19.000         | 9.000   | 111.000 |
|            | M6        | 16     | 31.250 | 18.164  | 26.500 | 19.500         | 34.500         | 15.000         | 15.000  | 88.000  |
| M7         | 8         | 38.000 | 25.428 | 28.500  | 20.500 | 49.000         | 28.500         | 16.000         | 92.000  |         |
| M8         | 2         | 32.500 | 12.021 | 32.500  | 24.000 | 41.000         | 17.000         | 24.000         | 41.000  |         |

Table S11. Descriptive statistics: Alanine aminotransferase (ALT) [U/L].

| SMA type   | Injection | N      | Mean   | Std Dev | Median | Lower Quartile | Upper Quartile | Quartile Range | Minimum | Maximum |
|------------|-----------|--------|--------|---------|--------|----------------|----------------|----------------|---------|---------|
| SMA type 2 | L1        | 13     | 31.538 | 29.105  | 17.000 | 16.000         | 34.000         | 18.000         | 8.000   | 111.000 |
|            | L2        | 11     | 28.636 | 27.292  | 17.000 | 13.000         | 39.000         | 26.000         | 8.000   | 99.000  |
|            | L3        | 12     | 25.917 | 24.956  | 14.500 | 12.500         | 31.000         | 18.500         | 10.000  | 94.000  |
|            | L4        | 11     | 26.182 | 24.082  | 17.000 | 10.000         | 28.000         | 18.000         | 8.000   | 90.000  |
|            | M1        | 11     | 24.909 | 28.483  | 12.000 | 10.000         | 38.000         | 28.000         | 9.000   | 103.000 |
|            | M2        | 10     | 30.600 | 25.954  | 19.000 | 12.000         | 40.000         | 28.000         | 10.000  | 90.000  |
|            | M3        | 10     | 30.100 | 30.824  | 15.000 | 11.000         | 34.000         | 23.000         | 10.000  | 101.000 |
|            | M4        | 9      | 26.444 | 23.222  | 17.000 | 12.000         | 40.000         | 28.000         | 6.000   | 76.000  |
|            | M5        | 6      | 27.333 | 13.292  | 26.000 | 17.000         | 37.000         | 20.000         | 13.000  | 45.000  |
|            | M6        | 2      | 35.500 | 2.121   | 35.500 | 34.000         | 37.000         | 3.000          | 34.000  | 37.000  |
|            | M7        | 0      | .      | .       | .      | .              | .              | .              | .       | .       |
|            | M8        | 0      | .      | .       | .      | .              | .              | .              | .       | .       |
| SMA type 3 | L1        | 33     | 47.727 | 24.240  | 38.000 | 32.000         | 64.000         | 32.000         | 17.000  | 118.000 |
|            | L2        | 22     | 39.727 | 20.972  | 31.000 | 25.000         | 57.000         | 32.000         | 14.000  | 98.000  |
|            | L3        | 20     | 45.800 | 27.604  | 35.000 | 25.000         | 58.500         | 33.500         | 17.000  | 119.000 |
|            | L4        | 21     | 40.333 | 19.430  | 34.000 | 28.000         | 47.000         | 19.000         | 21.000  | 86.000  |
|            | M1        | 26     | 38.038 | 18.010  | 34.000 | 28.000         | 46.000         | 18.000         | 11.000  | 88.000  |
|            | M2        | 27     | 47.296 | 46.959  | 33.000 | 27.000         | 47.000         | 20.000         | 16.000  | 265.000 |
|            | M3        | 19     | 49.158 | 47.318  | 36.000 | 27.000         | 49.000         | 22.000         | 15.000  | 228.000 |
|            | M4        | 16     | 55.438 | 37.331  | 44.000 | 31.500         | 71.000         | 39.500         | 18.000  | 162.000 |
|            | M5        | 17     | 56.588 | 42.726  | 41.000 | 33.000         | 80.000         | 47.000         | 14.000  | 193.000 |
|            | M6        | 14     | 51.857 | 29.838  | 47.500 | 30.000         | 58.000         | 28.000         | 17.000  | 125.000 |
|            | M7        | 8      | 63.875 | 51.271  | 47.000 | 33.000         | 79.000         | 46.000         | 15.000  | 178.000 |
|            | M8        | 2      | 48.000 | 21.213  | 48.000 | 33.000         | 63.000         | 30.000         | 33.000  | 63.000  |
| Total      | L1        | 46     | 43.152 | 26.421  | 35.000 | 23.000         | 60.000         | 37.000         | 8.000   | 118.000 |
|            | L2        | 33     | 36.030 | 23.443  | 28.000 | 18.000         | 53.000         | 35.000         | 8.000   | 99.000  |
|            | L3        | 32     | 38.344 | 27.994  | 29.500 | 17.500         | 50.000         | 32.500         | 10.000  | 119.000 |
|            | L4        | 32     | 35.469 | 21.847  | 28.000 | 23.000         | 44.500         | 21.500         | 8.000   | 90.000  |
|            | M1        | 37     | 34.135 | 22.082  | 32.000 | 18.000         | 43.000         | 25.000         | 9.000   | 103.000 |
|            | M2        | 37     | 42.784 | 42.632  | 30.000 | 23.000         | 47.000         | 24.000         | 10.000  | 265.000 |
|            | M3        | 29     | 42.586 | 42.776  | 28.000 | 19.000         | 48.000         | 29.000         | 10.000  | 228.000 |
|            | M4        | 25     | 45.000 | 35.391  | 38.000 | 18.000         | 52.000         | 34.000         | 6.000   | 162.000 |
|            | M5        | 23     | 48.957 | 39.247  | 37.000 | 31.000         | 48.000         | 17.000         | 13.000  | 193.000 |
|            | M6        | 16     | 49.813 | 28.339  | 45.000 | 32.000         | 56.500         | 24.500         | 17.000  | 125.000 |
| M7         | 8         | 63.875 | 51.271 | 47.000  | 33.000 | 79.000         | 46.000         | 15.000         | 178.000 |         |
| M8         | 2         | 48.000 | 21.213 | 48.000  | 33.000 | 63.000         | 30.000         | 33.000         | 63.000  |         |

Table S1m. Descriptive statistics: Gamma-glutamyltransferase (GGT) [U/L].

| SMA type   | Injection | N      | Mean   | Std Dev | Median | Lower Quartile | Upper Quartile | Quartile Range | Minimum | Maximum |
|------------|-----------|--------|--------|---------|--------|----------------|----------------|----------------|---------|---------|
| SMA type 2 | L1        | 13     | 36.077 | 45.106  | 20.000 | 15.000         | 30.000         | 15.000         | 7.000   | 176.000 |
|            | L2        | 11     | 33.091 | 39.162  | 17.000 | 11.000         | 34.000         | 23.000         | 7.000   | 142.000 |
|            | L3        | 12     | 34.167 | 48.867  | 18.000 | 11.000         | 27.500         | 16.500         | 7.000   | 181.000 |
|            | L4        | 11     | 28.091 | 23.067  | 23.000 | 11.000         | 39.000         | 28.000         | 7.000   | 73.000  |
|            | M1        | 11     | 29.636 | 36.319  | 15.000 | 13.000         | 27.000         | 14.000         | 7.000   | 126.000 |
|            | M2        | 10     | 46.000 | 53.398  | 21.000 | 18.000         | 64.000         | 46.000         | 10.000  | 185.000 |
|            | M3        | 10     | 43.300 | 62.945  | 16.000 | 11.000         | 58.000         | 47.000         | 9.000   | 214.000 |
|            | M4        | 9      | 43.667 | 54.231  | 22.000 | 13.000         | 50.000         | 37.000         | 9.000   | 174.000 |
|            | M5        | 6      | 31.667 | 34.604  | 22.000 | 12.000         | 25.000         | 13.000         | 8.000   | 101.000 |
|            | M6        | 2      | 25.000 | 2.828   | 25.000 | 23.000         | 27.000         | 4.000          | 23.000  | 27.000  |
|            | M7        | 0      | .      | .       | .      | .              | .              | .              | .       | .       |
|            | M8        | 0      | .      | .       | .      | .              | .              | .              | .       | .       |
| SMA type 3 | L1        | 33     | 43.697 | 39.329  | 32.000 | 20.000         | 50.000         | 30.000         | 7.000   | 190.000 |
|            | L2        | 22     | 35.091 | 30.611  | 27.000 | 17.000         | 39.000         | 22.000         | 12.000  | 145.000 |
|            | L3        | 20     | 42.700 | 45.299  | 28.000 | 17.500         | 46.000         | 28.500         | 11.000  | 216.000 |
|            | L4        | 21     | 32.619 | 22.074  | 27.000 | 18.000         | 40.000         | 22.000         | 9.000   | 93.000  |
|            | M1        | 26     | 35.154 | 37.404  | 25.000 | 16.000         | 39.000         | 23.000         | 10.000  | 190.000 |
|            | M2        | 27     | 39.296 | 32.214  | 26.000 | 16.000         | 53.000         | 37.000         | 11.000  | 130.000 |
|            | M3        | 19     | 35.579 | 30.204  | 20.000 | 16.000         | 45.000         | 29.000         | 7.000   | 111.000 |
|            | M4        | 16     | 48.563 | 43.273  | 29.000 | 19.000         | 71.000         | 52.000         | 12.000  | 143.000 |
|            | M5        | 17     | 48.235 | 41.050  | 31.000 | 20.000         | 53.000         | 33.000         | 10.000  | 148.000 |
|            | M6        | 14     | 46.786 | 44.430  | 33.000 | 19.000         | 50.000         | 31.000         | 11.000  | 167.000 |
|            | M7        | 8      | 59.625 | 45.396  | 34.500 | 26.500         | 106.000        | 79.500         | 16.000  | 127.000 |
|            | M8        | 2      | 49.500 | 37.477  | 49.500 | 23.000         | 76.000         | 53.000         | 23.000  | 76.000  |
| Total      | L1        | 46     | 41.543 | 40.676  | 27.500 | 16.000         | 50.000         | 34.000         | 7.000   | 190.000 |
|            | L2        | 33     | 34.424 | 33.093  | 26.000 | 14.000         | 35.000         | 21.000         | 7.000   | 145.000 |
|            | L3        | 32     | 39.500 | 46.072  | 25.000 | 15.500         | 44.000         | 28.500         | 7.000   | 216.000 |
|            | L4        | 32     | 31.063 | 22.153  | 23.500 | 16.500         | 39.500         | 23.000         | 7.000   | 93.000  |
|            | M1        | 37     | 33.514 | 36.668  | 20.000 | 15.000         | 32.000         | 17.000         | 7.000   | 190.000 |
|            | M2        | 37     | 41.108 | 38.359  | 25.000 | 18.000         | 53.000         | 35.000         | 10.000  | 185.000 |
|            | M3        | 29     | 38.241 | 43.289  | 20.000 | 13.000         | 45.000         | 32.000         | 7.000   | 214.000 |
|            | M4        | 25     | 46.800 | 46.437  | 26.000 | 16.000         | 50.000         | 34.000         | 9.000   | 174.000 |
|            | M5        | 23     | 43.913 | 39.408  | 25.000 | 19.000         | 53.000         | 34.000         | 8.000   | 148.000 |
|            | M6        | 16     | 44.063 | 42.032  | 29.500 | 20.000         | 44.500         | 24.500         | 11.000  | 167.000 |
| M7         | 8         | 59.625 | 45.396 | 34.500  | 26.500 | 106.000        | 79.500         | 16.000         | 127.000 |         |
| M8         | 2         | 49.500 | 37.477 | 49.500  | 23.000 | 76.000         | 53.000         | 23.000         | 76.000  |         |

Table S2a. Change from baseline (L1): Cerebrospinal fluid (CSF) - White blood cell (WBC) count [number/ $\mu$ L].

| Injection      | SMA type   | N  | Mean   | Std Dev | Median | Lower Quartile | Upper Quartile | Quartile Range | Min     | Max    | p-value* |
|----------------|------------|----|--------|---------|--------|----------------|----------------|----------------|---------|--------|----------|
| L2             | SMA type 2 | 9  | 0.000  | 1.5000  | 0.000  | -1.000         | 1.000          | 2.000          | -2.000  | 3.000  | 1.0000   |
| L2             | SMA type 3 | 33 | 0.394  | 3.2972  | 1.000  | 0.000          | 2.000          | 2.000          | -12.000 | 9.000  | 0.1078   |
| L2             | Total      | 42 | 0.310  | 2.9918  | 0.000  | -1.000         | 2.000          | 3.000          | -12.000 | 9.000  | 0.2153   |
| L3             | SMA type 2 | 12 | 1.667  | 4.4992  | 0.500  | -1.000         | 2.000          | 3.000          | -4.000  | 12.000 | 0.7539   |
| L3             | SMA type 3 | 30 | 0.667  | 1.6884  | 1.000  | 0.000          | 2.000          | 2.000          | -4.000  | 4.000  | 0.0525   |
| L3             | Total      | 42 | 0.952  | 2.7670  | 1.000  | 0.000          | 2.000          | 2.000          | -4.000  | 12.000 | 0.0501   |
| L4             | SMA type 2 | 10 | -0.400 | 2.1187  | -0.500 | -1.000         | 1.000          | 2.000          | -5.000  | 2.000  | 1.0000   |
| L4             | SMA type 3 | 33 | -0.182 | 1.6096  | 0.000  | -1.000         | 1.000          | 2.000          | -4.000  | 4.000  | 0.8238   |
| L4             | Total      | 43 | -0.233 | 1.7160  | 0.000  | -1.000         | 1.000          | 2.000          | -5.000  | 4.000  | 0.7111   |
| M1             | SMA type 2 | 10 | -0.100 | 1.2867  | 0.000  | -1.000         | 0.000          | 1.000          | -2.000  | 3.000  | 0.6250   |
| M1             | SMA type 3 | 29 | -0.069 | 1.8113  | 0.000  | -1.000         | 1.000          | 2.000          | -4.000  | 4.000  | 0.8145   |
| M1             | Total      | 39 | -0.077 | 1.6762  | 0.000  | -1.000         | 0.000          | 1.000          | -4.000  | 4.000  | 0.5235   |
| M2             | SMA type 2 | 8  | -2.000 | 4.5356  | -0.500 | -1.500         | 0.000          | 1.500          | -13.000 | 1.000  | 0.3750   |
| M2             | SMA type 3 | 24 | -0.792 | 2.7502  | 0.000  | -2.000         | 1.000          | 3.000          | -11.000 | 4.000  | 0.8036   |
| M2             | Total      | 32 | -1.094 | 3.2464  | 0.000  | -2.000         | 0.500          | 2.500          | -13.000 | 4.000  | 0.3833   |
| M3             | SMA type 2 | 12 | -0.333 | 1.3707  | 0.000  | -1.500         | 1.000          | 2.500          | -3.000  | 1.000  | 1.0000   |
| M3             | SMA type 3 | 17 | 0.176  | 5.1990  | 0.000  | -1.000         | 1.000          | 2.000          | -12.000 | 16.000 | 1.0000   |
| M3             | Total      | 29 | -0.034 | 4.0310  | 0.000  | -1.000         | 1.000          | 2.000          | -12.000 | 16.000 | 1.0000   |
| M4             | SMA type 2 | 8  | -0.375 | 1.5059  | -0.500 | -1.000         | 0.500          | 1.500          | -3.000  | 2.000  | 0.6875   |
| M4             | SMA type 3 | 16 | -0.563 | 3.4635  | 0.000  | -0.500         | 1.000          | 1.500          | -12.000 | 3.000  | 0.7539   |
| M4             | Total      | 24 | -0.500 | 2.9192  | 0.000  | -1.000         | 1.000          | 2.000          | -12.000 | 3.000  | 1.0000   |
| M5             | SMA type 2 | 7  | 0.286  | 1.7995  | 1.000  | -1.000         | 2.000          | 3.000          | -3.000  | 2.000  | 0.6875   |
| M5             | SMA type 3 | 15 | -1.333 | 3.2878  | 0.000  | -3.000         | 0.000          | 3.000          | -11.000 | 4.000  | 0.1797   |
| M5             | Total      | 22 | -0.818 | 2.9542  | 0.000  | -2.000         | 1.000          | 3.000          | -11.000 | 4.000  | 0.6072   |
| M6             | SMA type 2 | 3  | 0.000  | 1.0000  | 0.000  | -1.000         | 1.000          | 2.000          | -1.000  | 1.000  | 1.0000   |
| M6             | SMA type 3 | 13 | -1.308 | 3.6603  | -1.000 | -2.000         | 0.000          | 2.000          | -11.000 | 5.000  | 0.3438   |
| M6             | Total      | 16 | -1.063 | 3.3360  | -0.500 | -2.000         | 0.500          | 2.500          | -11.000 | 5.000  | 0.3877   |
| M7             | SMA type 2 | 1  | -3.000 | .       | -3.000 | -3.000         | -3.000         | 0.000          | -3.000  | -3.000 | 1.0000   |
| M7             | SMA type 3 | 8  | -1.625 | 2.9731  | -1.500 | -2.000         | 0.000          | 2.000          | -8.000  | 2.000  | 0.2891   |
| M7             | Total      | 9  | -1.778 | 2.8186  | -2.000 | -2.000         | -1.000         | 1.000          | -8.000  | 2.000  | 0.1797   |
| M8             | SMA type 3 | 2  | -1.500 | 2.1213  | -1.500 | -3.000         | 0.000          | 3.000          | -3.000  | 0.000  | 1.0000   |
| M8             | Total      | 2  | -1.500 | 2.1213  | -1.500 | -3.000         | 0.000          | 3.000          | -3.000  | 0.000  | 1.0000   |
| Last available | SMA type 2 | 12 | 0.167  | 1.7495  | 0.500  | -0.500         | 1.500          | 2.000          | -3.000  | 2.000  | 0.5078   |
| Last available | SMA type 3 | 34 | -0.382 | 2.2964  | 0.000  | -2.000         | 0.000          | 2.000          | -8.000  | 5.000  | 0.5034   |
| Last available | Total      | 46 | -0.239 | 2.1621  | 0.000  | -1.000         | 1.000          | 2.000          | -8.000  | 5.000  | 1.0000   |

\*p-value of sign test

Table S2b. Change from baseline (L1): Cerebrospinal fluid (CSF) - Glucose [mg/dL].

| Injection      | SMA type   | N  | Mean    | Std Dev | Median  | Lower Quartile | Upper Quartile | Quartile Range | Min     | Max     | p-value* |
|----------------|------------|----|---------|---------|---------|----------------|----------------|----------------|---------|---------|----------|
| L2             | SMA type 2 | 9  | -3.000  | 5.3385  | -1.000  | -6.000         | 1.000          | 7.000          | -13.000 | 3.000   | 0.7266   |
| L2             | SMA type 3 | 33 | -0.788  | 4.2994  | -1.000  | -4.000         | 2.000          | 6.000          | -12.000 | 7.000   | 0.4869   |
| L2             | Total      | 42 | -1.262  | 4.5642  | -1.000  | -4.000         | 2.000          | 6.000          | -13.000 | 7.000   | 0.3489   |
| L3             | SMA type 2 | 12 | -0.500  | 3.4245  | -1.000  | -2.500         | 1.500          | 4.000          | -5.000  | 7.000   | 0.5488   |
| L3             | SMA type 3 | 29 | -0.897  | 3.1774  | -1.000  | -3.000         | 1.000          | 4.000          | -6.000  | 5.000   | 0.1686   |
| L3             | Total      | 41 | -0.780  | 3.2133  | -1.000  | -3.000         | 1.000          | 4.000          | -6.000  | 7.000   | 0.0989   |
| L4             | SMA type 2 | 10 | -0.600  | 5.1683  | -0.500  | -3.000         | 4.000          | 7.000          | -10.000 | 6.000   | 1.0000   |
| L4             | SMA type 3 | 33 | -1.030  | 3.8119  | -1.000  | -2.000         | 1.000          | 3.000          | -12.000 | 6.000   | 0.5847   |
| L4             | Total      | 43 | -0.930  | 4.1022  | -1.000  | -3.000         | 1.000          | 4.000          | -12.000 | 6.000   | 0.5224   |
| M1             | SMA type 2 | 10 | -3.100  | 4.5326  | -3.500  | -5.000         | 0.000          | 5.000          | -10.000 | 4.000   | 0.1797   |
| M1             | SMA type 3 | 29 | -2.276  | 5.6940  | -2.000  | -5.000         | 1.000          | 6.000          | -19.000 | 10.000  | 0.0522   |
| M1             | Total      | 39 | -2.487  | 5.3748  | -2.000  | -5.000         | 1.000          | 6.000          | -19.000 | 10.000  | 0.0113   |
| M2             | SMA type 2 | 9  | -2.111  | 4.4001  | -2.000  | -5.000         | 1.000          | 6.000          | -9.000  | 5.000   | 0.7266   |
| M2             | SMA type 3 | 23 | -3.174  | 3.4857  | -3.000  | -5.000         | -1.000         | 4.000          | -10.000 | 3.000   | 0.0015   |
| M2             | Total      | 32 | -2.875  | 3.7222  | -3.000  | -5.000         | 0.000          | 5.000          | -10.000 | 5.000   | 0.0023   |
| M3             | SMA type 2 | 12 | -2.500  | 5.3852  | -2.000  | -5.000         | 0.500          | 5.500          | -13.000 | 6.000   | 0.2266   |
| M3             | SMA type 3 | 17 | -2.353  | 4.8598  | -2.000  | -6.000         | 1.000          | 7.000          | -11.000 | 7.000   | 0.2101   |
| M3             | Total      | 29 | -2.414  | 4.9894  | -2.000  | -6.000         | 1.000          | 7.000          | -13.000 | 7.000   | 0.0522   |
| M4             | SMA type 2 | 8  | -3.750  | 6.1586  | -2.000  | -7.500         | -0.500         | 7.000          | -15.000 | 5.000   | 0.1250   |
| M4             | SMA type 3 | 16 | -3.125  | 3.7572  | -3.000  | -6.500         | -0.500         | 6.000          | -10.000 | 5.000   | 0.0129   |
| M4             | Total      | 24 | -3.333  | 4.5651  | -3.000  | -6.500         | -0.500         | 6.000          | -15.000 | 5.000   | 0.0015   |
| M5             | SMA type 2 | 7  | -6.000  | 8.4853  | -7.000  | -13.000        | -2.000         | 11.000         | -15.000 | 10.000  | 0.1250   |
| M5             | SMA type 3 | 15 | -3.800  | 2.9809  | -4.000  | -6.000         | -2.000         | 4.000          | -10.000 | 2.000   | 0.0010   |
| M5             | Total      | 22 | -4.500  | 5.2531  | -4.000  | -7.000         | -2.000         | 5.000          | -15.000 | 10.000  | 0.0001   |
| M6             | SMA type 2 | 3  | -8.333  | 10.7858 | -13.000 | -16.000        | 4.000          | 20.000         | -16.000 | 4.000   | 1.0000   |
| M6             | SMA type 3 | 13 | -2.769  | 4.3618  | -2.000  | -6.000         | 0.000          | 6.000          | -11.000 | 4.000   | 0.2266   |
| M6             | Total      | 16 | -3.813  | 5.9802  | -2.500  | -7.500         | 0.500          | 8.000          | -16.000 | 4.000   | 0.1796   |
| M7             | SMA type 2 | 1  | -10.000 | .       | -10.000 | -10.000        | -10.000        | 0.000          | -10.000 | -10.000 | 1.0000   |
| M7             | SMA type 3 | 8  | -2.750  | 6.2507  | -4.500  | -6.500         | 1.000          | 7.500          | -11.000 | 9.000   | 0.7266   |
| M7             | Total      | 9  | -3.556  | 6.3268  | -6.000  | -7.000         | 1.000          | 8.000          | -11.000 | 9.000   | 0.5078   |
| M8             | SMA type 3 | 2  | -2.000  | 2.8284  | -2.000  | -4.000         | 0.000          | 4.000          | -4.000  | 0.000   | 1.0000   |
| M8             | Total      | 2  | -2.000  | 2.8284  | -2.000  | -4.000         | 0.000          | 4.000          | -4.000  | 0.000   | 1.0000   |
| Last available | SMA type 2 | 12 | -1.667  | 7.5839  | -0.500  | -7.000         | 4.000          | 11.000         | -16.000 | 10.000  | 0.7539   |
| Last available | SMA type 3 | 34 | -2.088  | 5.7807  | -2.000  | -6.000         | 1.000          | 7.000          | -19.000 | 10.000  | 0.0428   |
| Last available | Total      | 46 | -1.978  | 6.2129  | -1.500  | -6.000         | 1.000          | 7.000          | -19.000 | 10.000  | 0.0385   |

\*p-value of sign test



Table S2c. Change from baseline (L1): Cerebrospinal fluid (CSF) - Lactate [mmol/L].

| Injection      | SMA type   | N  | Mean   | Std Dev | Median | Lower Quartile | Upper Quartile | Quartile Range | Min    | Max   | p-value* |
|----------------|------------|----|--------|---------|--------|----------------|----------------|----------------|--------|-------|----------|
| L2             | SMA type 2 | 9  | 0.033  | 0.1658  | 0.000  | 0.000          | 0.100          | 0.100          | -0.200 | 0.300 | 0.6875   |
| L2             | SMA type 3 | 33 | -0.024 | 0.1838  | 0.000  | -0.200         | 0.100          | 0.300          | -0.400 | 0.400 | 0.7111   |
| L2             | Total      | 42 | -0.012 | 0.1797  | 0.000  | -0.200         | 0.100          | 0.300          | -0.400 | 0.400 | 1.0000   |
| L3             | SMA type 2 | 12 | 0.092  | 0.1676  | 0.100  | -0.100         | 0.250          | 0.350          | -0.100 | 0.300 | 0.5488   |
| L3             | SMA type 3 | 29 | 0.034  | 0.2208  | 0.100  | -0.200         | 0.200          | 0.400          | -0.400 | 0.500 | 0.5572   |
| L3             | Total      | 41 | 0.051  | 0.2063  | 0.100  | -0.100         | 0.200          | 0.300          | -0.400 | 0.500 | 0.3240   |
| L4             | SMA type 2 | 10 | 0.070  | 0.1252  | 0.050  | 0.000          | 0.200          | 0.200          | -0.100 | 0.200 | 0.4531   |
| L4             | SMA type 3 | 33 | 0.015  | 0.1970  | 0.100  | -0.100         | 0.100          | 0.200          | -0.400 | 0.400 | 0.5847   |
| L4             | Total      | 43 | 0.028  | 0.1830  | 0.100  | -0.100         | 0.200          | 0.300          | -0.400 | 0.400 | 0.3240   |
| M1             | SMA type 2 | 10 | 0.100  | 0.2000  | 0.100  | -0.100         | 0.300          | 0.400          | -0.200 | 0.400 | 0.5078   |
| M1             | SMA type 3 | 29 | 0.062  | 0.2933  | 0.000  | -0.100         | 0.200          | 0.300          | -0.800 | 0.800 | 0.6476   |
| M1             | Total      | 39 | 0.072  | 0.2704  | 0.000  | -0.100         | 0.200          | 0.300          | -0.800 | 0.800 | 0.3449   |
| M2             | SMA type 2 | 9  | -0.022 | 0.1302  | 0.000  | -0.100         | 0.100          | 0.200          | -0.300 | 0.100 | 1.0000   |
| M2             | SMA type 3 | 23 | -0.039 | 0.1994  | 0.000  | -0.200         | 0.100          | 0.300          | -0.500 | 0.300 | 1.0000   |
| M2             | Total      | 32 | -0.034 | 0.1807  | 0.000  | -0.200         | 0.100          | 0.300          | -0.500 | 0.300 | 1.0000   |
| M3             | SMA type 2 | 12 | 0.092  | 0.2151  | 0.100  | 0.000          | 0.250          | 0.250          | -0.400 | 0.400 | 0.1797   |
| M3             | SMA type 3 | 17 | 0.041  | 0.2123  | 0.100  | 0.000          | 0.200          | 0.200          | -0.400 | 0.400 | 0.1796   |
| M3             | Total      | 29 | 0.062  | 0.2111  | 0.100  | 0.000          | 0.200          | 0.200          | -0.400 | 0.400 | 0.0347   |
| M4             | SMA type 2 | 8  | 0.038  | 0.2134  | 0.100  | -0.050         | 0.150          | 0.200          | -0.400 | 0.300 | 0.4531   |
| M4             | SMA type 3 | 16 | 0.100  | 0.2280  | 0.100  | 0.000          | 0.200          | 0.200          | -0.400 | 0.600 | 0.1460   |
| M4             | Total      | 24 | 0.079  | 0.2206  | 0.100  | 0.000          | 0.200          | 0.200          | -0.400 | 0.600 | 0.0636   |
| M5             | SMA type 2 | 7  | 0.029  | 0.1976  | 0.000  | -0.100         | 0.200          | 0.300          | -0.300 | 0.300 | 1.0000   |
| M5             | SMA type 3 | 15 | 0.093  | 0.2017  | 0.100  | -0.100         | 0.200          | 0.300          | -0.200 | 0.500 | 0.1796   |
| M5             | Total      | 22 | 0.073  | 0.1980  | 0.100  | -0.100         | 0.200          | 0.300          | -0.300 | 0.500 | 0.1671   |
| M6             | SMA type 2 | 3  | -0.067 | 0.2082  | 0.000  | -0.300         | 0.100          | 0.400          | -0.300 | 0.100 | 1.0000   |
| M6             | SMA type 3 | 13 | -0.031 | 0.1843  | 0.000  | -0.200         | 0.100          | 0.300          | -0.300 | 0.400 | 0.7539   |
| M6             | Total      | 16 | -0.038 | 0.1821  | 0.000  | -0.200         | 0.100          | 0.300          | -0.300 | 0.400 | 0.7744   |
| M7             | SMA type 2 | 1  | 0.000  | .       | 0.000  | 0.000          | 0.000          | 0.000          | 0.000  | 0.000 |          |
| M7             | SMA type 3 | 8  | -0.050 | 0.1852  | -0.100 | -0.150         | 0.050          | 0.200          | -0.300 | 0.300 | 0.4531   |
| M7             | Total      | 9  | -0.044 | 0.1740  | -0.100 | -0.100         | 0.000          | 0.100          | -0.300 | 0.300 | 0.4531   |
| M8             | SMA type 3 | 2  | -0.150 | 0.3536  | -0.150 | -0.400         | 0.100          | 0.500          | -0.400 | 0.100 | 1.0000   |
| M8             | Total      | 2  | -0.150 | 0.3536  | -0.150 | -0.400         | 0.100          | 0.500          | -0.400 | 0.100 | 1.0000   |
| Last available | SMA type 2 | 12 | 0.100  | 0.1859  | 0.150  | 0.000          | 0.250          | 0.250          | -0.300 | 0.300 | 0.1797   |
| Last available | SMA type 3 | 34 | 0.006  | 0.2103  | 0.000  | -0.100         | 0.100          | 0.200          | -0.500 | 0.400 | 0.6900   |
| Last available | Total      | 46 | 0.030  | 0.2064  | 0.000  | -0.100         | 0.200          | 0.300          | -0.500 | 0.400 | 0.2295   |

\*p-value of sign test

Table S2d. Change from baseline (L1): Cerebrospinal fluid (CSF) – Total protein [mg/dL].

| Injection      | SMA type   | N  | Mean   | Std Dev | Median | Lower Quartile | Upper Quartile | Quartile Range | Min     | Max    | p-value* |
|----------------|------------|----|--------|---------|--------|----------------|----------------|----------------|---------|--------|----------|
| L2             | SMA type 2 | 9  | 2.556  | 3.1667  | 1.000  | 0.000          | 6.000          | 6.000          | -1.000  | 7.000  | 0.2188   |
| L2             | SMA type 3 | 33 | 0.848  | 5.3626  | 1.000  | -1.000         | 4.000          | 5.000          | -14.000 | 9.000  | 0.2649   |
| L2             | Total      | 42 | 1.214  | 4.9904  | 1.000  | -1.000         | 5.000          | 6.000          | -14.000 | 9.000  | 0.0895   |
| L3             | SMA type 2 | 12 | 1.750  | 4.4339  | 2.000  | 0.000          | 5.500          | 5.500          | -8.000  | 7.000  | 0.1094   |
| L3             | SMA type 3 | 29 | 0.138  | 5.3031  | 1.000  | 0.000          | 2.000          | 2.000          | -16.000 | 12.000 | 0.0784   |
| L3             | Total      | 41 | 0.610  | 5.0640  | 1.000  | 0.000          | 3.000          | 3.000          | -16.000 | 12.000 | 0.0107   |
| L4             | SMA type 2 | 10 | -1.500 | 4.0893  | -0.500 | -2.000         | 1.000          | 3.000          | -11.000 | 2.000  | 1.0000   |
| L4             | SMA type 3 | 33 | 0.121  | 5.9569  | 0.000  | -3.000         | 2.000          | 5.000          | -11.000 | 22.000 | 0.7111   |
| L4             | Total      | 43 | -0.256 | 5.5767  | 0.000  | -3.000         | 2.000          | 5.000          | -11.000 | 22.000 | 0.6271   |
| M1             | SMA type 2 | 10 | 2.600  | 7.8060  | 1.500  | 0.000          | 5.000          | 5.000          | -10.000 | 18.000 | 0.1797   |
| M1             | SMA type 3 | 29 | -0.138 | 5.3567  | 1.000  | -2.000         | 4.000          | 6.000          | -18.000 | 8.000  | 1.0000   |
| M1             | Total      | 39 | 0.564  | 6.0862  | 1.000  | -2.000         | 4.000          | 6.000          | -18.000 | 18.000 | 0.4177   |
| M2             | SMA type 2 | 9  | 7.111  | 11.6667 | 4.000  | 1.000          | 13.000         | 12.000         | -7.000  | 32.000 | 0.1797   |
| M2             | SMA type 3 | 23 | 0.696  | 6.8120  | 1.000  | -2.000         | 5.000          | 7.000          | -17.000 | 13.000 | 0.5034   |
| M2             | Total      | 32 | 2.500  | 8.7547  | 2.000  | -2.000         | 6.000          | 8.000          | -17.000 | 32.000 | 0.1360   |
| M3             | SMA type 2 | 12 | 6.417  | 13.5878 | 3.500  | 1.000          | 11.500         | 10.500         | -15.000 | 41.000 | 0.0654   |
| M3             | SMA type 3 | 17 | 1.353  | 4.1524  | 1.000  | -1.000         | 5.000          | 6.000          | -6.000  | 9.000  | 0.8036   |
| M3             | Total      | 29 | 3.448  | 9.4248  | 2.000  | -1.000         | 6.000          | 7.000          | -15.000 | 41.000 | 0.1221   |
| M4             | SMA type 2 | 8  | 6.500  | 11.6374 | 5.500  | 1.000          | 9.000          | 8.000          | -10.000 | 31.000 | 0.0703   |
| M4             | SMA type 3 | 16 | 3.063  | 5.1182  | 2.500  | 0.500          | 5.500          | 5.000          | -7.000  | 13.000 | 0.0352   |
| M4             | Total      | 24 | 4.208  | 7.8129  | 3.000  | 1.000          | 7.500          | 6.500          | -10.000 | 31.000 | 0.0026   |
| M5             | SMA type 2 | 7  | 4.571  | 9.8125  | 2.000  | -4.000         | 13.000         | 17.000         | -5.000  | 22.000 | 1.0000   |
| M5             | SMA type 3 | 15 | 4.133  | 6.6961  | 5.000  | -3.000         | 9.000          | 12.000         | -7.000  | 18.000 | 0.1185   |
| M5             | Total      | 22 | 4.273  | 7.5793  | 5.000  | -3.000         | 9.000          | 12.000         | -7.000  | 22.000 | 0.1338   |
| M6             | SMA type 2 | 3  | 0.333  | 1.5275  | 0.000  | -1.000         | 2.000          | 3.000          | -1.000  | 2.000  | 1.0000   |
| M6             | SMA type 3 | 13 | 4.077  | 5.8660  | 2.000  | 0.000          | 6.000          | 6.000          | -3.000  | 15.000 | 0.1460   |
| M6             | Total      | 16 | 3.375  | 5.4879  | 2.000  | -0.500         | 6.000          | 6.500          | -3.000  | 15.000 | 0.1796   |
| M7             | SMA type 2 | 1  | -2.000 | .       | -2.000 | -2.000         | -2.000         | 0.000          | -2.000  | -2.000 | 1.0000   |
| M7             | SMA type 3 | 8  | 3.000  | 6.5247  | 5.000  | 1.000          | 7.000          | 6.000          | -11.000 | 9.000  | 0.2891   |
| M7             | Total      | 9  | 2.444  | 6.3268  | 5.000  | -2.000         | 7.000          | 9.000          | -11.000 | 9.000  | 0.5078   |
| M8             | SMA type 3 | 2  | 7.000  | 7.0711  | 7.000  | 2.000          | 12.000         | 10.000         | 2.000   | 12.000 | 0.5000   |
| M8             | Total      | 2  | 7.000  | 7.0711  | 7.000  | 2.000          | 12.000         | 10.000         | 2.000   | 12.000 | 0.5000   |
| Last available | SMA type 2 | 12 | 3.833  | 7.9639  | 1.000  | -1.500         | 9.000          | 10.500         | -5.000  | 22.000 | 0.7539   |
| Last available | SMA type 3 | 34 | 2.588  | 5.4111  | 4.000  | -1.000         | 6.000          | 7.000          | -11.000 | 12.000 | 0.0135   |
| Last available | Total      | 46 | 2.913  | 6.1058  | 3.000  | -1.000         | 6.000          | 7.000          | -11.000 | 22.000 | 0.0137   |

\*p-value of sign test

Table S2e. Change from baseline (L1): White blood cell (WBC) count [number/nL].

| Injection      | SMA type   | N  | Mean   | Std Dev | Median | Lower Quartile | Upper Quartile | Quartile Range | Min    | Max    | p-value* |
|----------------|------------|----|--------|---------|--------|----------------|----------------|----------------|--------|--------|----------|
| L2             | SMA type 2 | 11 | 0.223  | 1.3142  | 0.110  | -0.180         | 0.540          | 0.720          | -2.160 | 2.560  | 1.0000   |
| L2             | SMA type 3 | 21 | -0.266 | 1.4522  | -0.130 | -1.100         | 0.610          | 1.710          | -3.150 | 2.960  | 1.0000   |
| L2             | Total      | 32 | -0.098 | 1.4047  | -0.030 | -1.015         | 0.575          | 1.590          | -3.150 | 2.960  | 1.0000   |
| L3             | SMA type 2 | 11 | -0.252 | 1.5183  | 0.090  | -0.630         | 0.680          | 1.310          | -3.740 | 1.930  | 1.0000   |
| L3             | SMA type 3 | 21 | 0.038  | 1.3307  | -0.040 | -0.820         | 0.870          | 1.690          | -2.780 | 2.930  | 1.0000   |
| L3             | Total      | 32 | -0.062 | 1.3805  | 0.025  | -0.725         | 0.855          | 1.580          | -3.740 | 2.930  | 1.0000   |
| L4             | SMA type 2 | 11 | 0.919  | 1.9901  | 0.900  | -0.200         | 1.310          | 1.510          | -1.200 | 6.090  | 1.0000   |
| L4             | SMA type 3 | 20 | -0.252 | 1.2651  | -0.530 | -0.970         | 0.440          | 1.410          | -2.680 | 3.160  | 0.2632   |
| L4             | Total      | 31 | 0.164  | 1.6303  | -0.110 | -0.800         | 1.050          | 1.850          | -2.680 | 6.090  | 0.4731   |
| M1             | SMA type 2 | 10 | 0.701  | 1.0660  | 0.725  | 0.330          | 0.980          | 0.650          | -1.440 | 2.430  | 0.1094   |
| M1             | SMA type 3 | 27 | -0.007 | 0.9681  | -0.060 | -0.630         | 0.620          | 1.250          | -1.660 | 2.890  | 0.7011   |
| M1             | Total      | 37 | 0.185  | 1.0307  | 0.080  | -0.510         | 0.790          | 1.300          | -1.660 | 2.890  | 0.7428   |
| M2             | SMA type 2 | 11 | 0.029  | 1.0646  | 0.220  | -0.750         | 0.710          | 1.460          | -2.010 | 1.780  | 0.5488   |
| M2             | SMA type 3 | 26 | 0.100  | 1.3079  | 0.200  | -0.310         | 0.730          | 1.040          | -3.100 | 2.850  | 0.5572   |
| M2             | Total      | 37 | 0.079  | 1.2263  | 0.220  | -0.310         | 0.710          | 1.020          | -3.100 | 2.850  | 0.3240   |
| M3             | SMA type 2 | 10 | 0.255  | 2.2978  | 0.015  | -0.460         | 1.830          | 2.290          | -3.710 | 4.340  | 1.0000   |
| M3             | SMA type 3 | 18 | -0.536 | 1.9598  | 0.005  | -1.230         | 0.540          | 1.770          | -6.390 | 1.630  | 1.0000   |
| M3             | Total      | 28 | -0.254 | 2.0802  | 0.005  | -1.035         | 0.635          | 1.670          | -6.390 | 4.340  | 1.0000   |
| M4             | SMA type 2 | 8  | 0.013  | 1.8450  | -0.240 | -1.205         | 0.575          | 1.780          | -2.050 | 3.890  | 1.0000   |
| M4             | SMA type 3 | 15 | 0.413  | 1.4211  | 0.310  | -0.150         | 1.060          | 1.210          | -2.280 | 3.880  | 0.1185   |
| M4             | Total      | 23 | 0.273  | 1.5512  | 0.260  | -0.780         | 0.970          | 1.750          | -2.280 | 3.890  | 0.2100   |
| M5             | SMA type 2 | 6  | -0.618 | 1.8003  | -0.060 | -2.340         | 0.850          | 3.190          | -3.200 | 1.100  | 1.0000   |
| M5             | SMA type 3 | 16 | 0.067  | 1.2751  | 0.240  | -0.630         | 1.055          | 1.685          | -2.620 | 2.050  | 0.8036   |
| M5             | Total      | 22 | -0.120 | 1.4250  | 0.240  | -0.730         | 0.850          | 1.580          | -3.200 | 2.050  | 0.8318   |
| M6             | SMA type 2 | 2  | -0.920 | 1.2869  | -0.920 | -1.830         | -0.010         | 1.820          | -1.830 | -0.010 | 0.5000   |
| M6             | SMA type 3 | 14 | -0.094 | 1.6325  | -0.255 | -0.860         | 1.660          | 2.520          | -3.960 | 1.940  | 0.7905   |
| M6             | Total      | 16 | -0.198 | 1.5810  | -0.255 | -0.940         | 1.045          | 1.985          | -3.960 | 1.940  | 0.4545   |
| M7             | SMA type 3 | 8  | 0.294  | 1.0520  | 0.075  | -0.430         | 0.795          | 1.225          | -0.880 | 2.350  | 1.0000   |
| M7             | Total      | 8  | 0.294  | 1.0520  | 0.075  | -0.430         | 0.795          | 1.225          | -0.880 | 2.350  | 1.0000   |
| M8             | SMA type 3 | 2  | 0.190  | 2.8284  | 0.190  | -1.810         | 2.190          | 4.000          | -1.810 | 2.190  | 1.0000   |
| M8             | Total      | 2  | 0.190  | 2.8284  | 0.190  | -1.810         | 2.190          | 4.000          | -1.810 | 2.190  | 1.0000   |
| Last available | SMA type 2 | 13 | 0.061  | 1.2204  | 0.180  | -0.180         | 0.590          | 0.770          | -2.350 | 2.440  | 0.5811   |
| Last available | SMA type 3 | 35 | -0.160 | 1.4666  | -0.090 | -0.880         | 0.450          | 1.330          | -3.970 | 2.930  | 0.7359   |
| Last available | Total      | 48 | -0.100 | 1.3950  | 0.000  | -0.710         | 0.490          | 1.200          | -3.970 | 2.930  | 1.0000   |

\*p-value of sign test

Table S2f. Change from baseline (L1): Platelet count [number/nL].

| Injection      | SMA type   | N  | Mean    | Std Dev  | Median  | Lower Quartile | Upper Quartile | Quartile Range | Min      | Max     | p-value* |
|----------------|------------|----|---------|----------|---------|----------------|----------------|----------------|----------|---------|----------|
| L2             | SMA type 2 | 11 | -7.000  | 49.9480  | -12.000 | -46.000        | 1.000          | 47.000         | -57.000  | 117.000 | 0.5488   |
| L2             | SMA type 3 | 21 | -2.333  | 35.6810  | -4.000  | -22.000        | 15.000         | 37.000         | -68.000  | 74.000  | 1.0000   |
| L2             | Total      | 32 | -3.938  | 40.3884  | -8.000  | -35.000        | 13.500         | 48.500         | -68.000  | 117.000 | 0.5966   |
| L3             | SMA type 2 | 11 | -22.909 | 67.3253  | -20.000 | -71.000        | 3.000          | 74.000         | -109.000 | 137.000 | 0.2266   |
| L3             | SMA type 3 | 21 | -2.381  | 35.0777  | -4.000  | -23.000        | 16.000         | 39.000         | -71.000  | 83.000  | 0.6636   |
| L3             | Total      | 32 | -9.438  | 48.5193  | -9.500  | -35.000        | 14.500         | 49.500         | -109.000 | 137.000 | 0.2153   |
| L4             | SMA type 2 | 11 | -8.182  | 109.3836 | 7.000   | -73.000        | 44.000         | 117.000        | -265.000 | 148.000 | 0.5488   |
| L4             | SMA type 3 | 20 | 3.350   | 31.3944  | -4.500  | -18.000        | 20.500         | 38.500         | -37.000  | 91.000  | 0.8238   |
| L4             | Total      | 31 | -0.742  | 68.1464  | 3.000   | -19.000        | 25.000         | 44.000         | -265.000 | 148.000 | 1.0000   |
| M1             | SMA type 2 | 10 | 8.500   | 66.4584  | 0.500   | -23.000        | 32.000         | 55.000         | -114.000 | 123.000 | 1.0000   |
| M1             | SMA type 3 | 27 | 11.407  | 42.8308  | 4.000   | -18.000        | 29.000         | 47.000         | -53.000  | 139.000 | 0.8450   |
| M1             | Total      | 37 | 10.622  | 49.3031  | 4.000   | -20.000        | 29.000         | 49.000         | -114.000 | 139.000 | 0.8679   |
| M2             | SMA type 2 | 11 | -16.273 | 65.0278  | -25.000 | -49.000        | 20.000         | 69.000         | -135.000 | 125.000 | 0.5488   |
| M2             | SMA type 3 | 26 | 8.269   | 54.5253  | 0.000   | -14.000        | 19.000         | 33.000         | -78.000  | 172.000 | 1.0000   |
| M2             | Total      | 37 | 0.973   | 58.0390  | -2.000  | -25.000        | 19.000         | 44.000         | -135.000 | 172.000 | 0.7359   |
| M3             | SMA type 2 | 10 | -10.500 | 95.4908  | -19.000 | -68.000        | 12.000         | 80.000         | -159.000 | 212.000 | 0.7539   |
| M3             | SMA type 3 | 18 | -4.944  | 44.5110  | 2.500   | -26.000        | 20.000         | 46.000         | -119.000 | 95.000  | 0.8145   |
| M3             | Total      | 28 | -6.929  | 65.5308  | -1.000  | -34.500        | 19.500         | 54.000         | -159.000 | 212.000 | 1.0000   |
| M4             | SMA type 2 | 8  | -38.750 | 98.3198  | -32.000 | -101.500       | 13.000         | 114.500        | -195.000 | 126.000 | 1.0000   |
| M4             | SMA type 3 | 15 | 8.000   | 36.4319  | 4.000   | -24.000        | 20.000         | 44.000         | -41.000  | 80.000  | 0.6072   |
| M4             | Total      | 23 | -8.261  | 66.6239  | 4.000   | -40.000        | 19.000         | 59.000         | -195.000 | 126.000 | 0.6776   |
| M5             | SMA type 2 | 6  | -60.333 | 60.2849  | -56.000 | -117.000       | -7.000         | 110.000        | -139.000 | 13.000  | 0.2188   |
| M5             | SMA type 3 | 16 | -1.188  | 37.8104  | 2.500   | -25.500        | 26.000         | 51.500         | -73.000  | 62.000  | 0.8036   |
| M5             | Total      | 22 | -17.318 | 51.1211  | -8.000  | -40.000        | 13.000         | 53.000         | -139.000 | 62.000  | 0.8318   |
| M6             | SMA type 2 | 2  | -83.000 | 4.2426   | -83.000 | -86.000        | -80.000        | 6.000          | -86.000  | -80.000 | 0.5000   |
| M6             | SMA type 3 | 14 | -7.214  | 44.4543  | 12.000  | -48.000        | 27.000         | 75.000         | -94.000  | 54.000  | 0.7905   |
| M6             | Total      | 16 | -16.688 | 48.8258  | -4.000  | -54.500        | 25.500         | 80.000         | -94.000  | 54.000  | 1.0000   |
| M7             | SMA type 3 | 8  | 0.375   | 16.8008  | -2.000  | -13.500        | 16.500         | 30.000         | -21.000  | 22.000  | 1.0000   |
| M7             | Total      | 8  | 0.375   | 16.8008  | -2.000  | -13.500        | 16.500         | 30.000         | -21.000  | 22.000  | 1.0000   |
| M8             | SMA type 3 | 2  | 16.000  | 9.8995   | 16.000  | 9.000          | 23.000         | 14.000         | 9.000    | 23.000  | 0.5000   |
| M8             | Total      | 2  | 16.000  | 9.8995   | 16.000  | 9.000          | 23.000         | 14.000         | 9.000    | 23.000  | 0.5000   |
| Last available | SMA type 2 | 13 | -39.000 | 95.3904  | -33.000 | -101.000       | 1.000          | 102.000        | -159.000 | 212.000 | 0.2668   |
| Last available | SMA type 3 | 35 | 2.714   | 37.3076  | 3.000   | -17.000        | 23.000         | 40.000         | -94.000  | 95.000  | 0.8642   |
| Last available | Total      | 48 | -8.583  | 60.6717  | -4.500  | -28.000        | 22.000         | 50.000         | -159.000 | 212.000 | 0.7709   |

\*p-value of sign test

Table S2g. Change from baseline (L1): International normalized ratio (INR).

| Injection      | SMA type   | N  | Mean   | Std Dev | Median | Lower Quartile | Upper Quartile | Quartile Range | Min    | Max   | p-value* |
|----------------|------------|----|--------|---------|--------|----------------|----------------|----------------|--------|-------|----------|
| L2             | SMA type 2 | 11 | 0.008  | 0.0565  | 0.020  | -0.050         | 0.050          | 0.100          | -0.070 | 0.100 | 1.0000   |
| L2             | SMA type 3 | 12 | 0.004  | 0.0323  | 0.015  | -0.025         | 0.025          | 0.050          | -0.050 | 0.050 | 0.5488   |
| L2             | Total      | 23 | 0.006  | 0.0445  | 0.020  | -0.030         | 0.040          | 0.070          | -0.070 | 0.100 | 0.5235   |
| L3             | SMA type 2 | 9  | 0.002  | 0.0524  | 0.020  | -0.040         | 0.030          | 0.070          | -0.060 | 0.090 | 1.0000   |
| L3             | SMA type 3 | 11 | -0.006 | 0.0406  | -0.010 | -0.030         | 0.000          | 0.030          | -0.050 | 0.100 | 0.1797   |
| L3             | Total      | 20 | -0.003 | 0.0452  | -0.010 | -0.035         | 0.020          | 0.055          | -0.060 | 0.100 | 0.4807   |
| L4             | SMA type 2 | 10 | 0.011  | 0.0489  | 0.010  | -0.020         | 0.040          | 0.060          | -0.060 | 0.110 | 1.0000   |
| L4             | SMA type 3 | 11 | -0.002 | 0.0334  | 0.000  | -0.030         | 0.010          | 0.040          | -0.040 | 0.080 | 1.0000   |
| L4             | Total      | 21 | 0.004  | 0.0409  | 0.000  | -0.020         | 0.020          | 0.040          | -0.060 | 0.110 | 1.0000   |
| M1             | SMA type 2 | 10 | 0.022  | 0.0607  | 0.000  | -0.020         | 0.070          | 0.090          | -0.070 | 0.120 | 1.0000   |
| M1             | SMA type 3 | 10 | 0.003  | 0.0320  | 0.005  | -0.030         | 0.030          | 0.060          | -0.040 | 0.050 | 1.0000   |
| M1             | Total      | 20 | 0.013  | 0.0482  | 0.000  | -0.020         | 0.035          | 0.055          | -0.070 | 0.120 | 0.8036   |
| M2             | SMA type 2 | 11 | 0.014  | 0.0590  | 0.000  | -0.030         | 0.080          | 0.110          | -0.070 | 0.090 | 1.0000   |
| M2             | SMA type 3 | 8  | 0.028  | 0.0324  | 0.020  | 0.020          | 0.045          | 0.025          | -0.030 | 0.080 | 0.0703   |
| M2             | Total      | 19 | 0.019  | 0.0489  | 0.020  | -0.020         | 0.070          | 0.090          | -0.070 | 0.090 | 0.2379   |
| M3             | SMA type 2 | 9  | 0.010  | 0.0574  | 0.000  | -0.020         | 0.070          | 0.090          | -0.070 | 0.090 | 1.0000   |
| M3             | SMA type 3 | 3  | 0.017  | 0.0513  | 0.030  | -0.040         | 0.060          | 0.100          | -0.040 | 0.060 | 1.0000   |
| M3             | Total      | 12 | 0.012  | 0.0537  | 0.010  | -0.030         | 0.065          | 0.095          | -0.070 | 0.090 | 1.0000   |
| M4             | SMA type 2 | 8  | 0.008  | 0.0385  | 0.005  | -0.020         | 0.030          | 0.050          | -0.040 | 0.070 | 0.6875   |
| M4             | SMA type 3 | 3  | 0.017  | 0.0153  | 0.020  | 0.000          | 0.030          | 0.030          | 0.000  | 0.030 | 0.5000   |
| M4             | Total      | 11 | 0.010  | 0.0332  | 0.010  | 0.000          | 0.030          | 0.030          | -0.040 | 0.070 | 0.2891   |
| M5             | SMA type 2 | 6  | 0.002  | 0.0319  | -0.005 | -0.030         | 0.040          | 0.070          | -0.030 | 0.040 | 1.0000   |
| M5             | SMA type 3 | 3  | 0.017  | 0.0379  | 0.000  | -0.010         | 0.060          | 0.070          | -0.010 | 0.060 | 1.0000   |
| M5             | Total      | 9  | 0.007  | 0.0324  | 0.000  | -0.010         | 0.040          | 0.050          | -0.030 | 0.060 | 1.0000   |
| M6             | SMA type 2 | 2  | 0.010  | 0.0141  | 0.010  | 0.000          | 0.020          | 0.020          | 0.000  | 0.020 | 1.0000   |
| M6             | SMA type 3 | 3  | 0.057  | 0.0611  | 0.070  | -0.010         | 0.110          | 0.120          | -0.010 | 0.110 | 1.0000   |
| M6             | Total      | 5  | 0.038  | 0.0507  | 0.020  | 0.000          | 0.070          | 0.070          | -0.010 | 0.110 | 0.6250   |
| M7             | SMA type 3 | 1  | 0.050  | .       | 0.050  | 0.050          | 0.050          | 0.000          | 0.050  | 0.050 | 1.0000   |
| M7             | Total      | 1  | 0.050  | .       | 0.050  | 0.050          | 0.050          | 0.000          | 0.050  | 0.050 | 1.0000   |
| Last available | SMA type 2 | 12 | 0.014  | 0.0326  | 0.005  | -0.010         | 0.040          | 0.050          | -0.030 | 0.080 | 0.7539   |
| Last available | SMA type 3 | 13 | 0.012  | 0.0426  | 0.000  | -0.020         | 0.030          | 0.050          | -0.030 | 0.110 | 1.0000   |
| Last available | Total      | 25 | 0.013  | 0.0374  | 0.000  | -0.020         | 0.040          | 0.060          | -0.030 | 0.110 | 0.8318   |

\*p-value of sign test

Table S2h. Change from baseline (L1): Activated partial thromboplastin time (aPTT) [s].

| Injection      | SMA type   | N  | Mean   | Std Dev | Median | Lower Quartile | Upper Quartile | Quartile Range | Min    | Max    | p-value* |
|----------------|------------|----|--------|---------|--------|----------------|----------------|----------------|--------|--------|----------|
| L2             | SMA type 2 | 11 | 0.000  | 1.1636  | -0.100 | -1.000         | 1.100          | 2.100          | -1.700 | 1.800  | 1.0000   |
| L2             | SMA type 3 | 11 | -0.373 | 0.7643  | -0.400 | -1.000         | 0.100          | 1.100          | -1.200 | 1.300  | 0.3438   |
| L2             | Total      | 22 | -0.186 | 0.9795  | -0.200 | -1.000         | 0.300          | 1.300          | -1.700 | 1.800  | 0.3833   |
| L3             | SMA type 2 | 9  | -0.844 | 2.1448  | -1.000 | -1.300         | 0.200          | 1.500          | -5.600 | 1.800  | 0.5078   |
| L3             | SMA type 3 | 11 | -0.991 | 2.2133  | -0.100 | -2.100         | 0.400          | 2.500          | -5.900 | 1.900  | 0.7539   |
| L3             | Total      | 20 | -0.925 | 2.1262  | -0.700 | -1.550         | 0.350          | 1.900          | -5.900 | 1.900  | 0.3593   |
| L4             | SMA type 2 | 10 | -0.210 | 1.7214  | 0.250  | -0.600         | 0.500          | 1.100          | -4.700 | 1.800  | 0.3438   |
| L4             | SMA type 3 | 11 | -0.791 | 0.8983  | -0.900 | -1.300         | -0.300         | 1.000          | -2.500 | 1.100  | 0.0117   |
| L4             | Total      | 21 | -0.514 | 1.3510  | -0.600 | -1.000         | 0.400          | 1.400          | -4.700 | 1.800  | 0.3833   |
| M1             | SMA type 2 | 10 | -0.280 | 2.0330  | -0.550 | -1.500         | 1.600          | 3.100          | -4.200 | 2.400  | 1.0000   |
| M1             | SMA type 3 | 10 | -1.150 | 1.8374  | -1.350 | -2.200         | -0.700         | 1.500          | -4.300 | 2.100  | 0.1094   |
| M1             | Total      | 20 | -0.715 | 1.9381  | -1.200 | -1.650         | 1.250          | 2.900          | -4.300 | 2.400  | 0.2632   |
| M2             | SMA type 2 | 11 | 0.418  | 1.9626  | 0.600  | -1.600         | 2.400          | 4.000          | -2.400 | 2.500  | 1.0000   |
| M2             | SMA type 3 | 8  | 0.425  | 1.6926  | 0.850  | -0.100         | 1.450          | 1.550          | -3.200 | 2.200  | 0.2891   |
| M2             | Total      | 19 | 0.421  | 1.8039  | 0.800  | -1.000         | 2.100          | 3.100          | -3.200 | 2.500  | 0.3593   |
| M3             | SMA type 2 | 9  | -1.067 | 2.6608  | -0.200 | -2.900         | 1.200          | 4.100          | -5.500 | 2.000  | 1.0000   |
| M3             | SMA type 3 | 3  | 0.400  | 1.7776  | -0.200 | -1.000         | 2.400          | 3.400          | -1.000 | 2.400  | 1.0000   |
| M3             | Total      | 12 | -0.700 | 2.4827  | -0.200 | -2.450         | 1.200          | 3.650          | -5.500 | 2.400  | 0.7744   |
| M4             | SMA type 2 | 8  | -1.375 | 1.8375  | -1.950 | -2.900         | 0.200          | 3.100          | -3.300 | 1.600  | 0.2891   |
| M4             | SMA type 3 | 3  | -0.733 | 0.4163  | -0.600 | -1.200         | -0.400         | 0.800          | -1.200 | -0.400 | 0.2500   |
| M4             | Total      | 11 | -1.200 | 1.5773  | -1.200 | -2.800         | -0.100         | 2.700          | -3.300 | 1.600  | 0.0654   |
| M5             | SMA type 2 | 6  | -0.533 | 1.0912  | -0.450 | -1.600         | 0.500          | 2.100          | -1.800 | 0.600  | 1.0000   |
| M5             | SMA type 3 | 3  | -1.767 | 0.9866  | -1.300 | -2.900         | -1.100         | 1.800          | -2.900 | -1.100 | 0.2500   |
| M5             | Total      | 9  | -0.944 | 1.1695  | -1.100 | -1.600         | 0.200          | 1.800          | -2.900 | 0.600  | 0.5078   |
| M6             | SMA type 2 | 2  | -3.250 | 3.1820  | -3.250 | -5.500         | -1.000         | 4.500          | -5.500 | -1.000 | 0.5000   |
| M6             | SMA type 3 | 3  | -0.600 | 1.0149  | -0.400 | -1.700         | 0.300          | 2.000          | -1.700 | 0.300  | 1.0000   |
| M6             | Total      | 5  | -1.660 | 2.2700  | -1.000 | -1.700         | -0.400         | 1.300          | -5.500 | 0.300  | 0.3750   |
| M7             | SMA type 3 | 1  | -0.700 | .       | -0.700 | -0.700         | -0.700         | 0.000          | -0.700 | -0.700 | 1.0000   |
| M7             | Total      | 1  | -0.700 | .       | -0.700 | -0.700         | -0.700         | 0.000          | -0.700 | -0.700 | 1.0000   |
| Last available | SMA type 2 | 12 | -2.117 | 1.9423  | -1.600 | -3.150         | -1.000         | 2.150          | -5.500 | 0.500  | 0.0386   |
| Last available | SMA type 3 | 13 | -0.700 | 1.6119  | -0.700 | -1.700         | -0.100         | 1.600          | -3.200 | 2.200  | 0.0923   |
| Last available | Total      | 25 | -1.380 | 1.8841  | -1.000 | -2.500         | -0.300         | 2.200          | -5.500 | 2.200  | 0.0041   |

\*p-value of sign test

Table S2i. Change from baseline (L1): Creatinine [mg/dL].

| Injection      | SMA type   | N  | Mean   | Std Dev | Median | Lower Quartile | Upper Quartile | Quartile Range | Min    | Max    | p-value* |
|----------------|------------|----|--------|---------|--------|----------------|----------------|----------------|--------|--------|----------|
| L2             | SMA type 2 | 10 | -0.025 | 0.0448  | -0.025 | -0.070         | 0.010          | 0.080          | -0.090 | 0.050  | 0.5078   |
| L2             | SMA type 3 | 21 | 0.043  | 0.1225  | 0.030  | 0.000          | 0.050          | 0.050          | -0.170 | 0.390  | 0.0963   |
| L2             | Total      | 31 | 0.021  | 0.1080  | 0.010  | -0.030         | 0.040          | 0.070          | -0.170 | 0.390  | 0.4421   |
| L3             | SMA type 2 | 11 | -0.011 | 0.0614  | -0.020 | -0.040         | 0.020          | 0.060          | -0.130 | 0.120  | 0.5488   |
| L3             | SMA type 3 | 19 | -0.007 | 0.0909  | 0.010  | -0.050         | 0.040          | 0.090          | -0.210 | 0.160  | 0.8145   |
| L3             | Total      | 30 | -0.009 | 0.0802  | -0.005 | -0.040         | 0.030          | 0.070          | -0.210 | 0.160  | 1.0000   |
| L4             | SMA type 2 | 10 | -0.004 | 0.0695  | 0.010  | -0.050         | 0.030          | 0.080          | -0.120 | 0.110  | 0.7539   |
| L4             | SMA type 3 | 19 | -0.017 | 0.0682  | 0.000  | -0.060         | 0.040          | 0.100          | -0.150 | 0.070  | 1.0000   |
| L4             | Total      | 29 | -0.012 | 0.0677  | 0.010  | -0.050         | 0.040          | 0.090          | -0.150 | 0.110  | 0.8506   |
| M1             | SMA type 2 | 10 | -0.001 | 0.0584  | 0.015  | -0.030         | 0.030          | 0.060          | -0.110 | 0.090  | 0.7539   |
| M1             | SMA type 3 | 25 | -0.033 | 0.0949  | -0.010 | -0.080         | 0.030          | 0.110          | -0.300 | 0.110  | 0.8388   |
| M1             | Total      | 35 | -0.024 | 0.0865  | 0.000  | -0.070         | 0.030          | 0.100          | -0.300 | 0.110  | 1.0000   |
| M2             | SMA type 2 | 10 | 0.013  | 0.1237  | -0.005 | -0.070         | 0.040          | 0.110          | -0.110 | 0.330  | 1.0000   |
| M2             | SMA type 3 | 25 | -0.032 | 0.0745  | -0.020 | -0.060         | 0.010          | 0.070          | -0.220 | 0.080  | 0.0433   |
| M2             | Total      | 35 | -0.019 | 0.0916  | -0.020 | -0.060         | 0.020          | 0.080          | -0.220 | 0.330  | 0.0576   |
| M3             | SMA type 2 | 9  | -0.018 | 0.0959  | 0.010  | -0.060         | 0.020          | 0.080          | -0.170 | 0.160  | 1.0000   |
| M3             | SMA type 3 | 17 | -0.032 | 0.0706  | -0.010 | -0.080         | 0.020          | 0.100          | -0.190 | 0.070  | 0.4240   |
| M3             | Total      | 26 | -0.027 | 0.0786  | -0.005 | -0.080         | 0.020          | 0.100          | -0.190 | 0.160  | 0.6776   |
| M4             | SMA type 2 | 8  | -0.019 | 0.1214  | -0.005 | -0.110         | 0.090          | 0.200          | -0.220 | 0.120  | 1.0000   |
| M4             | SMA type 3 | 15 | -0.015 | 0.0704  | -0.010 | -0.050         | 0.040          | 0.090          | -0.170 | 0.120  | 0.4240   |
| M4             | Total      | 23 | -0.017 | 0.0886  | -0.010 | -0.060         | 0.050          | 0.110          | -0.220 | 0.120  | 0.5235   |
| M5             | SMA type 2 | 6  | 0.048  | 0.1689  | 0.045  | -0.080         | 0.210          | 0.290          | -0.150 | 0.220  | 1.0000   |
| M5             | SMA type 3 | 16 | -0.023 | 0.0632  | -0.010 | -0.065         | 0.020          | 0.085          | -0.140 | 0.070  | 0.4545   |
| M5             | Total      | 22 | -0.003 | 0.1034  | -0.010 | -0.080         | 0.050          | 0.130          | -0.150 | 0.220  | 0.5235   |
| M6             | SMA type 2 | 2  | -0.125 | 0.0495  | -0.125 | -0.160         | -0.090         | 0.070          | -0.160 | -0.090 | 0.5000   |
| M6             | SMA type 3 | 14 | -0.084 | 0.1113  | -0.100 | -0.160         | -0.030         | 0.130          | -0.270 | 0.170  | 0.0574   |
| M6             | Total      | 16 | -0.089 | 0.1054  | -0.100 | -0.160         | -0.040         | 0.120          | -0.270 | 0.170  | 0.0213   |
| M7             | SMA type 3 | 8  | -0.095 | 0.0661  | -0.115 | -0.135         | -0.055         | 0.080          | -0.170 | 0.020  | 0.0703   |
| M7             | Total      | 8  | -0.095 | 0.0661  | -0.115 | -0.135         | -0.055         | 0.080          | -0.170 | 0.020  | 0.0703   |
| M8             | SMA type 3 | 2  | -0.130 | 0.1556  | -0.130 | -0.240         | -0.020         | 0.220          | -0.240 | -0.020 | 0.5000   |
| M8             | Total      | 2  | -0.130 | 0.1556  | -0.130 | -0.240         | -0.020         | 0.220          | -0.240 | -0.020 | 0.5000   |
| Last available | SMA type 2 | 13 | -0.041 | 0.1159  | -0.080 | -0.110         | 0.000          | 0.110          | -0.170 | 0.210  | 0.1460   |
| Last available | SMA type 3 | 33 | -0.109 | 0.0885  | -0.120 | -0.160         | -0.050         | 0.110          | -0.300 | 0.070  | <.0001   |
| Last available | Total      | 46 | -0.090 | 0.1006  | -0.100 | -0.150         | -0.040         | 0.110          | -0.300 | 0.210  | <.0001   |

\*p-value of sign test

Table S2j. Change from baseline (L1): Urea nitrogen [mg/dL].

| Injection      | SMA type   | N  | Mean   | Std Dev | Median | Lower Quartile | Upper Quartile | Quartile Range | Min     | Max    | p-value* |
|----------------|------------|----|--------|---------|--------|----------------|----------------|----------------|---------|--------|----------|
| L2             | SMA type 2 | 10 | 0.400  | 3.5963  | 0.000  | -1.000         | 1.000          | 2.000          | -5.000  | 9.000  | 1.0000   |
| L2             | SMA type 3 | 21 | 0.881  | 3.1619  | 1.000  | -1.000         | 3.000          | 4.000          | -4.000  | 9.000  | 0.3593   |
| L2             | Total      | 31 | 0.726  | 3.2554  | 0.500  | -1.000         | 2.000          | 3.000          | -5.000  | 9.000  | 0.4421   |
| L3             | SMA type 2 | 11 | 0.182  | 2.7863  | 0.000  | 0.000          | 1.000          | 1.000          | -7.000  | 5.000  | 0.2188   |
| L3             | SMA type 3 | 19 | 0.289  | 2.6942  | 0.000  | -2.000         | 2.000          | 4.000          | -4.000  | 7.000  | 1.0000   |
| L3             | Total      | 30 | 0.250  | 2.6805  | 0.000  | -1.000         | 1.000          | 2.000          | -7.000  | 7.000  | 0.5413   |
| L4             | SMA type 2 | 10 | 1.400  | 2.5033  | 1.000  | 1.000          | 1.000          | 0.000          | -1.000  | 8.000  | 0.1094   |
| L4             | SMA type 3 | 19 | -0.895 | 3.1667  | -2.000 | -3.000         | 2.000          | 5.000          | -6.400  | 5.000  | 0.2379   |
| L4             | Total      | 29 | -0.103 | 3.1134  | 0.000  | -2.000         | 1.000          | 3.000          | -6.400  | 8.000  | 1.0000   |
| M1             | SMA type 2 | 10 | 1.570  | 2.8449  | 2.000  | -1.000         | 3.000          | 4.000          | -3.000  | 7.000  | 0.3438   |
| M1             | SMA type 3 | 24 | -0.754 | 2.0862  | 0.000  | -3.000         | 0.450          | 3.450          | -4.200  | 2.400  | 0.3323   |
| M1             | Total      | 34 | -0.071 | 2.5290  | 0.000  | -1.000         | 2.000          | 3.000          | -4.200  | 7.000  | 1.0000   |
| M2             | SMA type 2 | 10 | 2.670  | 4.6452  | 1.000  | 0.000          | 5.000          | 5.000          | -2.000  | 14.000 | 0.1797   |
| M2             | SMA type 3 | 25 | -0.280 | 3.7958  | 0.000  | -2.000         | 2.000          | 4.000          | -11.000 | 5.000  | 0.8318   |
| M2             | Total      | 35 | 0.563  | 4.2084  | 1.000  | -2.000         | 2.000          | 4.000          | -11.000 | 14.000 | 0.2810   |
| M3             | SMA type 2 | 9  | 1.856  | 2.9728  | 2.000  | 0.000          | 3.000          | 3.000          | -2.000  | 7.000  | 0.4531   |
| M3             | SMA type 3 | 17 | 0.200  | 3.1979  | 1.000  | -1.700         | 2.000          | 3.700          | -9.000  | 4.000  | 0.4240   |
| M3             | Total      | 26 | 0.773  | 3.1651  | 1.000  | -1.300         | 3.000          | 4.300          | -9.000  | 7.000  | 0.1892   |
| M4             | SMA type 2 | 8  | 1.450  | 4.4782  | 1.000  | 0.200          | 4.100          | 3.900          | -7.000  | 8.000  | 0.2891   |
| M4             | SMA type 3 | 15 | -0.600 | 3.1803  | -2.000 | -3.000         | 2.000          | 5.000          | -5.000  | 4.000  | 1.0000   |
| M4             | Total      | 23 | 0.113  | 3.7167  | 1.000  | -2.000         | 2.200          | 4.200          | -7.000  | 8.000  | 0.6776   |
| M5             | SMA type 2 | 6  | 2.583  | 1.9600  | 3.000  | 2.000          | 4.000          | 2.000          | -1.000  | 4.500  | 0.2188   |
| M5             | SMA type 3 | 16 | -0.225 | 3.4847  | 0.500  | -3.000         | 2.500          | 5.500          | -8.000  | 4.000  | 1.0000   |
| M5             | Total      | 22 | 0.541  | 3.3507  | 1.200  | -1.000         | 3.000          | 4.000          | -8.000  | 4.500  | 0.3833   |
| M6             | SMA type 2 | 2  | 2.050  | 1.2021  | 2.050  | 1.200          | 2.900          | 1.700          | 1.200   | 2.900  | 0.5000   |
| M6             | SMA type 3 | 14 | -0.657 | 2.9586  | -1.500 | -3.000         | 2.000          | 5.000          | -4.000  | 5.000  | 0.1796   |
| M6             | Total      | 16 | -0.319 | 2.9219  | -0.850 | -3.000         | 2.450          | 5.450          | -4.000  | 5.000  | 0.4545   |
| M7             | SMA type 3 | 8  | 0.013  | 3.4967  | -0.650 | -2.800         | 2.850          | 5.650          | -4.300  | 5.600  | 1.0000   |
| M7             | Total      | 8  | 0.013  | 3.4967  | -0.650 | -2.800         | 2.850          | 5.650          | -4.300  | 5.600  | 1.0000   |
| M8             | SMA type 3 | 2  | -6.900 | 7.6368  | -6.900 | -12.300        | -1.500         | 10.800         | -12.300 | -1.500 | 0.5000   |
| M8             | Total      | 2  | -6.900 | 7.6368  | -6.900 | -12.300        | -1.500         | 10.800         | -12.300 | -1.500 | 0.5000   |
| Last available | SMA type 2 | 13 | 1.469  | 2.3991  | 1.000  | -0.600         | 3.000          | 3.600          | -2.000  | 5.700  | 0.2668   |
| Last available | SMA type 3 | 33 | -0.524 | 3.7102  | -0.600 | -2.600         | 2.100          | 4.700          | -12.300 | 5.600  | 0.5847   |
| Last available | Total      | 46 | 0.039  | 3.4853  | 0.000  | -1.700         | 2.900          | 4.600          | -12.300 | 5.700  | 1.0000   |

\*p-value of sign test



Table S2k. Change from baseline (L1): Aspartate aminotransferase (AST) [U/L].

| Injection      | SMA type   | N  | Mean    | Std Dev | Median  | Lower Quartile | Upper Quartile | Quartile Range | Min     | Max    | p-value* |
|----------------|------------|----|---------|---------|---------|----------------|----------------|----------------|---------|--------|----------|
| L2             | SMA type 2 | 10 | -5.100  | 6.8710  | -2.500  | -9.000         | 0.000          | 9.000          | -20.000 | 2.000  | 0.1797   |
| L2             | SMA type 3 | 21 | -3.190  | 5.4002  | -3.000  | -7.000         | -1.000         | 6.000          | -14.000 | 8.000  | 0.0266   |
| L2             | Total      | 31 | -3.806  | 5.8675  | -3.000  | -8.000         | 0.000          | 8.000          | -20.000 | 8.000  | 0.0052   |
| L3             | SMA type 2 | 11 | -2.818  | 7.2913  | -3.000  | -7.000         | 3.000          | 10.000         | -15.000 | 9.000  | 0.5488   |
| L3             | SMA type 3 | 19 | -2.000  | 6.8069  | -3.000  | -6.000         | 3.000          | 9.000          | -16.000 | 13.000 | 0.3593   |
| L3             | Total      | 30 | -2.300  | 6.8740  | -3.000  | -6.000         | 3.000          | 9.000          | -16.000 | 13.000 | 0.2005   |
| L4             | SMA type 2 | 10 | -1.300  | 6.0562  | -1.500  | -6.000         | 3.000          | 9.000          | -10.000 | 9.000  | 0.5078   |
| L4             | SMA type 3 | 19 | -1.000  | 7.1414  | -1.000  | -4.000         | 5.000          | 9.000          | -17.000 | 13.000 | 0.3593   |
| L4             | Total      | 29 | -1.103  | 6.6780  | -1.000  | -4.000         | 3.000          | 7.000          | -17.000 | 13.000 | 0.1849   |
| M1             | SMA type 2 | 10 | -5.200  | 7.0364  | -3.000  | -5.000         | -3.000         | 2.000          | -21.000 | 3.000  | 0.0391   |
| M1             | SMA type 3 | 24 | -2.167  | 7.4930  | -0.500  | -5.500         | 3.500          | 9.000          | -30.000 | 6.000  | 0.6636   |
| M1             | Total      | 34 | -3.059  | 7.3894  | -3.000  | -5.000         | 3.000          | 8.000          | -30.000 | 6.000  | 0.0987   |
| M2             | SMA type 2 | 9  | -2.000  | 5.6569  | -3.000  | -4.000         | 0.000          | 4.000          | -12.000 | 8.000  | 0.2891   |
| M2             | SMA type 3 | 25 | 0.880   | 16.9172 | -1.000  | -3.000         | 4.000          | 7.000          | -30.000 | 70.000 | 0.8388   |
| M2             | Total      | 34 | 0.118   | 14.7500 | -1.500  | -3.000         | 4.000          | 7.000          | -30.000 | 70.000 | 0.3771   |
| M3             | SMA type 2 | 9  | -4.333  | 4.4159  | -6.000  | -7.000         | -1.000         | 6.000          | -11.000 | 2.000  | 0.1797   |
| M3             | SMA type 3 | 17 | 1.176   | 16.4440 | 1.000   | -7.000         | 3.000          | 10.000         | -23.000 | 52.000 | 1.0000   |
| M3             | Total      | 26 | -0.731  | 13.6545 | -1.000  | -7.000         | 3.000          | 10.000         | -23.000 | 52.000 | 0.5572   |
| M4             | SMA type 2 | 8  | -5.625  | 7.5392  | -3.000  | -8.000         | -2.000         | 6.000          | -22.000 | 3.000  | 0.0703   |
| M4             | SMA type 3 | 15 | 0.667   | 10.1957 | 0.000   | -4.000         | 6.000          | 10.000         | -20.000 | 20.000 | 1.0000   |
| M4             | Total      | 23 | -1.522  | 9.6760  | -2.000  | -4.000         | 5.000          | 9.000          | -22.000 | 20.000 | 0.3833   |
| M5             | SMA type 2 | 6  | -4.000  | 10.3537 | -3.000  | -9.000         | 3.000          | 12.000         | -21.000 | 9.000  | 0.6875   |
| M5             | SMA type 3 | 16 | 4.188   | 15.0431 | 1.500   | -5.000         | 10.000         | 15.000         | -21.000 | 39.000 | 0.6072   |
| M5             | Total      | 22 | 1.955   | 14.1807 | 0.500   | -5.000         | 6.000          | 11.000         | -21.000 | 39.000 | 1.0000   |
| M6             | SMA type 2 | 2  | -3.000  | 2.8284  | -3.000  | -5.000         | -1.000         | 4.000          | -5.000  | -1.000 | 0.5000   |
| M6             | SMA type 3 | 14 | 1.500   | 10.2188 | 3.000   | -4.000         | 7.000          | 11.000         | -20.000 | 17.000 | 0.4240   |
| M6             | Total      | 16 | 0.938   | 9.6642  | 2.000   | -4.500         | 6.500          | 11.000         | -20.000 | 17.000 | 0.8036   |
| M7             | SMA type 3 | 8  | 1.875   | 13.3463 | 2.500   | -4.000         | 10.500         | 14.500         | -23.000 | 20.000 | 1.0000   |
| M7             | Total      | 8  | 1.875   | 13.3463 | 2.500   | -4.000         | 10.500         | 14.500         | -23.000 | 20.000 | 1.0000   |
| M8             | SMA type 3 | 2  | -13.500 | 12.0208 | -13.500 | -22.000        | -5.000         | 17.000         | -22.000 | -5.000 | 0.5000   |
| M8             | Total      | 2  | -13.500 | 12.0208 | -13.500 | -22.000        | -5.000         | 17.000         | -22.000 | -5.000 | 0.5000   |
| Last available | SMA type 2 | 13 | -1.615  | 5.4089  | -3.000  | -5.000         | -1.000         | 4.000          | -9.000  | 9.000  | 0.0923   |
| Last available | SMA type 3 | 33 | 1.182   | 9.3690  | 1.000   | -4.000         | 5.000          | 9.000          | -22.000 | 27.000 | 1.0000   |
| Last available | Total      | 46 | 0.391   | 8.4761  | -1.000  | -5.000         | 5.000          | 10.000         | -22.000 | 27.000 | 0.4614   |

\*p-value of sign test

Table S2L. Change from baseline (L1): Alanine aminotransferase (ALT) [U/L].

| Injection      | SMA type   | N  | Mean    | Std Dev | Median  | Lower Quartile | Upper Quartile | Quartile Range | Min     | Max     | p-value* |
|----------------|------------|----|---------|---------|---------|----------------|----------------|----------------|---------|---------|----------|
| L2             | SMA type 2 | 10 | -4.600  | 13.0231 | 0.500   | -12.000        | 3.000          | 15.000         | -31.000 | 13.000  | 1.0000   |
| L2             | SMA type 3 | 21 | -4.429  | 6.4929  | -4.000  | -7.000         | -2.000         | 5.000          | -22.000 | 10.000  | 0.0015   |
| L2             | Total      | 31 | -4.484  | 8.8877  | -4.000  | -8.000         | 1.000          | 9.000          | -31.000 | 13.000  | 0.0161   |
| L3             | SMA type 2 | 11 | -5.727  | 9.9909  | -2.000  | -17.000        | 2.000          | 19.000         | -24.000 | 4.000   | 0.5078   |
| L3             | SMA type 3 | 19 | 1.263   | 14.3482 | 0.000   | -11.000        | 11.000         | 22.000         | -20.000 | 34.000  | 1.0000   |
| L3             | Total      | 30 | -1.300  | 13.1887 | -1.000  | -11.000        | 2.000          | 13.000         | -24.000 | 34.000  | 0.7011   |
| L4             | SMA type 2 | 10 | -3.900  | 13.5929 | -4.500  | -17.000        | 6.000          | 23.000         | -21.000 | 17.000  | 0.7539   |
| L4             | SMA type 3 | 19 | -5.474  | 14.5921 | -2.000  | -11.000        | 1.000          | 12.000         | -50.000 | 21.000  | 0.2379   |
| L4             | Total      | 29 | -4.931  | 14.0304 | -2.000  | -11.000        | 2.000          | 13.000         | -50.000 | 21.000  | 0.1849   |
| M1             | SMA type 2 | 10 | -7.800  | 11.0534 | -4.000  | -8.000         | 0.000          | 8.000          | -32.000 | 2.000   | 0.0703   |
| M1             | SMA type 3 | 24 | -4.792  | 12.3323 | -4.500  | -12.000        | 4.000          | 16.000         | -35.000 | 16.000  | 0.2100   |
| M1             | Total      | 34 | -5.676  | 11.8851 | -4.500  | -11.000        | 2.000          | 13.000         | -35.000 | 16.000  | 0.0294   |
| M2             | SMA type 2 | 9  | -3.889  | 9.4001  | -1.000  | -11.000        | 2.000          | 13.000         | -21.000 | 9.000   | 1.0000   |
| M2             | SMA type 3 | 25 | 1.840   | 34.5467 | -2.000  | -11.000        | 9.000          | 20.000         | -37.000 | 147.000 | 0.8388   |
| M2             | Total      | 34 | 0.324   | 29.9330 | -1.500  | -11.000        | 7.000          | 18.000         | -37.000 | 147.000 | 0.7283   |
| M3             | SMA type 2 | 9  | -4.667  | 8.6747  | -3.000  | -9.000         | 1.000          | 10.000         | -23.000 | 5.000   | 0.5078   |
| M3             | SMA type 3 | 17 | 2.529   | 32.7912 | 3.000   | -6.000         | 9.000          | 15.000         | -54.000 | 110.000 | 1.0000   |
| M3             | Total      | 26 | 0.038   | 26.9154 | -2.000  | -9.000         | 5.000          | 14.000         | -54.000 | 110.000 | 0.8450   |
| M4             | SMA type 2 | 8  | -11.375 | 22.9031 | -2.500  | -14.000        | 0.000          | 14.000         | -64.000 | 6.000   | 0.2891   |
| M4             | SMA type 3 | 15 | 4.733   | 22.1439 | 0.000   | -4.000         | 16.000         | 20.000         | -33.000 | 44.000  | 1.0000   |
| M4             | Total      | 23 | -0.870  | 23.2483 | -2.000  | -5.000         | 15.000         | 20.000         | -64.000 | 44.000  | 0.5235   |
| M5             | SMA type 2 | 6  | -8.167  | 34.9767 | 1.000   | -6.000         | 5.000          | 11.000         | -76.000 | 26.000  | 1.0000   |
| M5             | SMA type 3 | 16 | 6.625   | 25.4293 | 5.000   | -5.000         | 19.500         | 24.500         | -40.000 | 75.000  | 0.8036   |
| M5             | Total      | 22 | 2.591   | 28.2601 | 2.000   | -6.000         | 16.000         | 22.000         | -76.000 | 75.000  | 0.6636   |
| M6             | SMA type 2 | 2  | -41.500 | 45.9619 | -41.500 | -74.000        | -9.000         | 65.000         | -74.000 | -9.000  | 0.5000   |
| M6             | SMA type 3 | 14 | 1.714   | 17.0809 | 4.000   | -12.000        | 14.000         | 26.000         | -31.000 | 33.000  | 0.7905   |
| M6             | Total      | 16 | -3.688  | 24.7298 | 0.000   | -12.500        | 11.000         | 23.500         | -74.000 | 33.000  | 1.0000   |
| M7             | SMA type 3 | 8  | 2.125   | 30.7638 | 4.000   | -16.500        | 13.500         | 30.000         | -45.000 | 60.000  | 1.0000   |
| M7             | Total      | 8  | 2.125   | 30.7638 | 4.000   | -16.500        | 13.500         | 30.000         | -45.000 | 60.000  | 1.0000   |
| M8             | SMA type 3 | 2  | -24.000 | 31.1127 | -24.000 | -46.000        | -2.000         | 44.000         | -46.000 | -2.000  | 0.5000   |
| M8             | Total      | 2  | -24.000 | 31.1127 | -24.000 | -46.000        | -2.000         | 44.000         | -46.000 | -2.000  | 0.5000   |
| Last available | SMA type 2 | 13 | -4.692  | 23.6057 | 0.000   | -6.000         | 5.000          | 11.000         | -74.000 | 26.000  | 1.0000   |
| Last available | SMA type 3 | 33 | -1.636  | 18.8046 | -2.000  | -12.000        | 8.000          | 20.000         | -46.000 | 60.000  | 0.2153   |
| Last available | Total      | 46 | -2.500  | 20.0497 | -2.000  | -12.000        | 6.000          | 18.000         | -74.000 | 60.000  | 0.3604   |

\*p-value of sign test

Table S2m. Change from baseline (L1): Gamma-glutamyltransferase (GGT) [U/L].

| Injection      | SMA type   | N  | Mean    | Std Dev | Median  | Lower Quartile | Upper Quartile | Quartile Range | Min     | Max    | p-value* |
|----------------|------------|----|---------|---------|---------|----------------|----------------|----------------|---------|--------|----------|
| L2             | SMA type 2 | 10 | -3.300  | 11.5859 | -2.000  | -4.000         | 4.000          | 8.000          | -34.000 | 7.000  | 0.7539   |
| L2             | SMA type 3 | 21 | -7.714  | 15.9848 | -2.000  | -7.000         | 0.000          | 7.000          | -61.000 | 5.000  | 0.0309   |
| L2             | Total      | 31 | -6.290  | 14.6633 | -2.000  | -7.000         | 1.000          | 8.000          | -61.000 | 7.000  | 0.0357   |
| L3             | SMA type 2 | 11 | 0.636   | 5.0452  | 3.000   | -1.000         | 4.000          | 5.000          | -12.000 | 5.000  | 0.5488   |
| L3             | SMA type 3 | 19 | 0.211   | 20.6306 | 3.000   | -3.000         | 9.000          | 12.000         | -76.000 | 26.000 | 0.2379   |
| L3             | Total      | 30 | 0.367   | 16.5227 | 3.000   | -3.000         | 4.000          | 7.000          | -76.000 | 26.000 | 0.1360   |
| L4             | SMA type 2 | 10 | 4.800   | 10.2610 | 3.000   | -4.000         | 6.000          | 10.000         | -6.000  | 24.000 | 0.7539   |
| L4             | SMA type 3 | 19 | -10.105 | 27.9799 | -1.000  | -9.000         | 4.000          | 13.000         | -97.000 | 11.000 | 0.6291   |
| L4             | Total      | 29 | -4.966  | 24.2715 | 0.000   | -4.000         | 4.000          | 8.000          | -97.000 | 24.000 | 1.0000   |
| M1             | SMA type 2 | 10 | -4.400  | 16.6012 | 0.000   | -4.000         | 5.000          | 9.000          | -50.000 | 6.000  | 1.0000   |
| M1             | SMA type 3 | 24 | -8.667  | 19.7499 | -3.500  | -8.500         | 0.000          | 8.500          | -93.000 | 7.000  | 0.0169   |
| M1             | Total      | 34 | -7.412  | 18.7328 | -3.000  | -7.000         | 2.000          | 9.000          | -93.000 | 7.000  | 0.0428   |
| M2             | SMA type 2 | 9  | 5.000   | 7.0356  | 4.000   | 1.000          | 9.000          | 8.000          | -4.000  | 20.000 | 0.1797   |
| M2             | SMA type 3 | 25 | -4.520  | 22.9821 | 1.000   | -6.000         | 4.000          | 10.000         | -83.000 | 27.000 | 1.0000   |
| M2             | Total      | 34 | -2.000  | 20.3544 | 1.500   | -4.000         | 5.000          | 9.000          | -83.000 | 27.000 | 0.3915   |
| M3             | SMA type 2 | 9  | 6.667   | 16.0390 | 0.000   | -2.000         | 4.000          | 6.000          | -7.000  | 38.000 | 1.0000   |
| M3             | SMA type 3 | 17 | -9.412  | 26.1774 | -1.000  | -9.000         | 3.000          | 12.000         | -83.000 | 21.000 | 0.8036   |
| M3             | Total      | 26 | -3.846  | 24.1192 | -0.500  | -7.000         | 4.000          | 11.000         | -83.000 | 38.000 | 0.8388   |
| M4             | SMA type 2 | 8  | 4.375   | 19.5444 | -2.000  | -5.500         | 6.500          | 12.000         | -13.000 | 50.000 | 0.7266   |
| M4             | SMA type 3 | 15 | 0.667   | 28.7270 | -1.000  | -11.000        | 10.000         | 21.000         | -50.000 | 61.000 | 1.0000   |
| M4             | Total      | 23 | 1.957   | 25.4942 | -2.000  | -8.000         | 7.000          | 15.000         | -50.000 | 61.000 | 0.6776   |
| M5             | SMA type 2 | 6  | 4.667   | 35.9036 | -1.500  | -7.000         | 5.000          | 12.000         | -38.000 | 71.000 | 1.0000   |
| M5             | SMA type 3 | 16 | 1.375   | 37.0889 | 1.000   | -12.000        | 18.000         | 30.000         | -86.000 | 89.000 | 1.0000   |
| M5             | Total      | 22 | 2.273   | 35.9407 | 0.000   | -7.000         | 18.000         | 25.000         | -86.000 | 89.000 | 1.0000   |
| M6             | SMA type 2 | 2  | -20.000 | 22.6274 | -20.000 | -36.000        | -4.000         | 32.000         | -36.000 | -4.000 | 0.5000   |
| M6             | SMA type 3 | 14 | 4.643   | 27.0060 | 2.500   | -4.000         | 5.000          | 9.000          | -46.000 | 77.000 | 0.4240   |
| M6             | Total      | 16 | 1.563   | 27.1489 | 1.500   | -7.500         | 4.500          | 12.000         | -46.000 | 77.000 | 0.8036   |
| M7             | SMA type 3 | 8  | 5.000   | 30.4209 | 0.000   | -8.500         | 21.500         | 30.000         | -43.000 | 57.000 | 1.0000   |
| M7             | Total      | 8  | 5.000   | 30.4209 | 0.000   | -8.500         | 21.500         | 30.000         | -43.000 | 57.000 | 1.0000   |
| M8             | SMA type 3 | 2  | 1.500   | 21.9203 | 1.500   | -14.000        | 17.000         | 31.000         | -14.000 | 17.000 | 1.0000   |
| M8             | Total      | 2  | 1.500   | 21.9203 | 1.500   | -14.000        | 17.000         | 31.000         | -14.000 | 17.000 | 1.0000   |
| Last available | SMA type 2 | 13 | 3.538   | 23.7122 | -2.000  | -4.000         | 5.000          | 9.000          | -36.000 | 71.000 | 1.0000   |
| Last available | SMA type 3 | 33 | -6.242  | 22.2008 | -1.000  | -11.000        | 3.000          | 14.000         | -86.000 | 37.000 | 0.4869   |
| Last available | Total      | 46 | -3.478  | 22.8091 | -1.500  | -7.000         | 4.000          | 11.000         | -86.000 | 71.000 | 0.4614   |

\*p-value of sign test
